# Supplementary material
Source: Frontiers journal article supplement (https://www.frontiersin.org/articles/371772)
Supplement: Data_Sheet_1.xlsx [file Data_Sheet_1.xlsx]

## Sheet: Table 1_PoS(649)_Selected
	Table 1. Water Quality Test (Location of dependent PoS at study area)
	Sl. No	Union name	Village name	Owner name of water point	Specific location of water point	Type of water point	No. of HH Dependent	Arsenic	Salinity	Iron	Using for drinking	Latitude	Longitude	Remarks
	1	Dhandia	Alipur	Sarkari	Deep tubewell beside the road	Deep Tubewell	50	1	0	1	1	22.7905	89.1107
	2	Dhandia	Alipur	Mosjid Committee	Mosjider Samne	Shallow Tubewell	30	0	0	1	1	22.7898	89.1062
	3	Dhandia	Dhandia	Sorkari's tubewell	North of bazar	Deep Tubewell	80	0	1	1	1	22.8189	89.1355
	4	Dhandia	Dhandia	Deb Prosad Das	beside temple west para	Deep Tubewell	30	0	0	0	1	22.8097	89.1289
	5	Dhandia	Enayetpur	Rihan Gazi	Gazi Para	Shallow Tubewell	20	0	0	0	1	22.8068	89.1383
	6	Dhandia	Fulbari	Fulbadia High School	Beside Fulbari bazar	Shallow Tubewell	50	0	0	1	1	22.8057	89.1191
	7	Dhandia	Fulbari	Fulbadia High School	Fulbari Bazar	Shallow Tubewell	80	0	0	1	1	22.8057	89.1194
	8	Dhandia	Fulbari	Fulbadia Sorkari Prathomic School	Beside Fulbari bazar	Shallow Tubewell	100	0	0	1	1	22.8056	89.1191
	9	Dhandia	Garidanga	shobur biswas	biswas para deep tube well	Deep Tubewell	30	0	0	0	1	22.8271	89.1009
	10	Dhandia	Garidanga	bara moshjid	bara moshjid's tube well	Shallow Tubewell	20	0	0	0	1	22.8268	89.1036
	11	Dhandia	Garidanga	deep tube well biswas para	deep tube well biswas para	Shallow Tubewell	40	0	0	0	1	22.8273	89.1021
	12	Dhandia	Garidanga	dhabuk para mosque	ghardanga mosque	Shallow Tubewell	40	1	0	1	1	22.8266	89.1099
	13	Dhandia	Gorerdagya	Mojafar Sana	Shana Para	Deep Tubewell	30	0	0	0	1	22.8283	89.1055
	14	Dhandia	Kachakhali	Sarkari Kol	South of Mosharof's house	Deep Tubewell	20	0	0	1	1	22.8262	89.1254
	15	Dhandia	Katakhali	moshjid commety	moshjid's tube well front side	Shallow Tubewell	40	0	0	1	1	22.826	89.1352
	16	Dhandia	Katakhali	ashok saha	ashok's tube well front side of house	Shallow Tubewell	30	0	0	1	1	22.8243	89.1328
	17	Dhandia	Kisnanagar	Nurislam Kha	Kha Para	Deep Tubewell	20	0	0	0	1	22.8239	89.1403
	18	Dhandia	Kisnanagar	Mosjid Shahajahan Gazi	Gazi Para	Shallow Tubewell	30	1	0	1	1	22.8236	89.1413
	19	Dhandia	Krisnonagar	Shontos Bissas	South Side Of Puja Mondop	Deep Tubewell	108	0	0	1	1	22.8259	89.1385
	20	Dhandia	Manikhar	Govt. Deep Tubewell	Sordar Para	Deep Tubewell	70	0	1	1	1	22.8127	89.1134
	21	Dhandia	Manikhar	anondo das	das para	Shallow Tubewell	40	0	0	1	1	22.8192	89.1127
	22	Dhandia	Manikhar	Government Tubewell	Mission para	Shallow Tubewell	20	0	0	0	1	22.8144	89.1148
	23	Dhandia	Manikhar	drip tubewell	das para	Shallow Tubewell	30	0	0	0	1	22.8267	89.1127
	24	Dhandia	Manikhara	Madrasa Bazar Dip's tubewell	Madrasha Bazar	Shallow Tubewell	20	0	1	0	1	22.8168	89.1162
	25	Dhandia	Manikhara	Madrasa Bazar	Madrasha Bazar	Shallow Tubewell	20	1	0	1	1	22.8171	89.1168
	26	Dhandia	Omorpur	Omor Pur Sorkari Dip's tubewell	Sardar Para	Shallow Tubewell	20	0	1	0	1	22.8154	89.099
	27	Dhandia	Omorpur	Omor Pur Sorkari Dip's tubewell	Sardar Para	Shallow Tubewell	20	1	0	1	1	22.815	89.0987
	28	Dhandia	Pachpara	Manik Gazi	West Para	Shallow Tubewell	20	0	0	1	1	22.7962	89.115
	29	Dhandia	Pachpara	MohiUddin Gazi	Primary School of Pach Para	Deep Tubewell	100	0	0	0	1	22.7942	89.1174
	30	Dhandia	Pachpara	Iman Ali	Pach Para, West Para	Shallow Tubewell	30	0	0	0	1	22.7972	89.1156
	31	Dhandia	Sarsa	Government tube well	side of primary school	Deep Tubewell	60	0	0	1	1	22.8253	89.1506
	32	Dhandia	Sarsa	primary school	side of primary school	Shallow Tubewell	40	0	0	1	1	22.8253	89.1502
	33	Dhandia	Sarsa	ajoi mukharji	north Sarsa	Shallow Tubewell	40	1	0	1	1	22.8203	89.1513
	34	Dhandia	Sarsha	Govt.	South Sarsa, Beside the road	Shallow Tubewell	40	0	0	0	1	22.8089	89.1452
	35	Dhandia	Senerganti	mosque committee	south side of mosque	Shallow Tubewell	50	0	0	1	1	22.8014	89.1222
	36	Dhandia	Senerganti	abdul salam sheikh	salam's tubewell, north side of house	Shallow Tubewell	32	0	0	1	1	22.8019	89.1233
	37	Dhandia	Senerganti	chiondon sardar	yard corner of house	Shallow Tubewell	20	0	0	1	1	22.8038	89.1295
	38	Dhandia	Senergati	Hafijur Rohman Sardar	West of Fulbari School	Shallow Tubewell	21	0	0	1	1	22.8065	89.1164
	39	Dhandia	Senergati	Bimol Chondro Mondol	West Para Bimol Babu's tubewell	Shallow Tubewell	20	1	0	1	1	22.8094	89.1164
	40	Dhandia	Senergati	Mosque Committee	Tubewell of Mosque of South Para	Shallow Tubewell	50	0	0	1	1	22.8025	89.1159
	41	Dhandia	Senergati	Babur Ali Morol	Tubewell of Mosque of South Para	Shallow Tubewell	50	0	0	1	1	22.8025	89.1159
	42	Dhandia	Senergati	Moslem Sarder	Tubewell of Mosque of South Para	Shallow Tubewell	50	0	0	1	1	22.8025	89.1159
	43	Dhandia	Sengati	Sener Gati Bazar	Senergati Market Mosque's tubewell	Shallow Tubewell	50	0	0	0	1	22.8135	89.1189
	44	Dhandia	South Sarsa	government dip	south sarsa, south side of road	Deep Tubewell	30	0	0	0	1	22.8172	89.1544
	45	Islamkati	barat	Purbapara's Government Tubewell	Purbapara's jame masjid tubewell	Deep Tubewell	150	0	0	1	1	22.7689	89.2139
	46	Islamkati	Barat	hossain ali gazi	gazi para hossain tubewell	Deep Tubewell	20	0	0	1	1	22.7694	89.2132
	47	Islamkati	Barat	barat primary school	barat primary school near	Deep Tubewell	150	0	0	1	1	22.7708	89.2136
	48	Islamkati	barat	dulal chandra das	das para dulal chandra's tubewell	Deep Tubewell	150	0	0	0	1	22.7692	89.2049
	49	Islamkati	barat	samol das	das para samol's tubewell	Shallow Tubewell	50	0	0	0	1	22.7728	89.2011
	50	Islamkati	barat	government	probir pal's home south side	Deep Tubewell	60	0	0	0	1	22.773	89.2113
	51	Islamkati	barat	shekh anser ali	shekh para anser ali's tubewell	Shallow Tubewell	40	0	0	0	1	22.7761	89.2084
	52	Islamkati	barat	Purbapara's Jame masjid	Purbapara's Jame Masjid	Shallow Tubewell	150	0	0	1	1	22.769	89.2136
	53	Islamkati	Barat	north para mosque	north para mosque near	Shallow Tubewell	100	0	0	1	1	22.7701	89.2149
	54	Islamkati	barat	karigor para mosque	karigor para mosque's tubewell	Shallow Tubewell	30	0	0	1	1	22.7696	89.2015
	55	Islamkati	Baukhola	poshchim para jame e moshjd	poshchim jame moshjid's tubewell	Deep Tubewell	50	0	0	1	1	22.7425	89.2082
	56	Islamkati	Bhabanipur	doctor para government tubewell	doctor para government tubewell	Deep Tubewell	20	0	0	1	1	22.7697	89.2248
	57	Islamkati	Bhabanipur	rajbongsi para government tubewell	rajbongsi para government tubewell	Deep Tubewell	50	0	0	1	1	22.7741	89.2282
	58	Islamkati	Bhabanipur	thakur para government tubewell	thakur para government tubewell	Deep Tubewell	50	0	0	1	1	22.767	89.2238
	59	Islamkati	Boukhola	mofijul molla	mofijul's tubewell molla para	Shallow Tubewell	30	0	0	0	1	22.742	89.2132
	60	Islamkati	Boukhola	monsur shekh	monsur's tubewell shekh para	Shallow Tubewell	20	0	0	1	1	22.7471	89.2142
	61	Islamkati	Chandpur	abdur gaffar sheikh	sheikh para abdur gaffar tubewell	Deep Tubewell	20	0	0	0	1	22.7319	89.2319
	62	Islamkati	Gandanga	Government deep tube well	east para mondir's deep tube well	Shallow Tubewell	40	0	1	1	1	22.7526	89.2148
	63	Islamkati	gandanga	government	halder para beside temple	Deep Tubewell	50	0	1	1	1	22.7578	89.2121
	64	Islamkati	Ghola	government tubewell	ghola/ besides azim morol house	Deep Tubewell	100	0	0	0	1	22.7581	89.2335
	65	Islamkati	Ghola	dolit	ghola government primary school	Deep Tubewell	50	0	0	0	1	22.7578	89.2323
	66	Islamkati	Ghola	muslim aid	ghola palli mongol school tubewell	Deep Tubewell	150	0	1	1	1	22.7579	89.2331
	67	Islamkati	Ghola	prodip das	big ghola prodip das house side	Deep Tubewell	80	0	0	0	1	22.7647	89.2293
	68	Islamkati	Ghola	razzak morol	moddho morol razzak house	Shallow Tubewell	50	0	0	0	1	22.7633	89.2306
	69	Islamkati	Ghola	sayad sazzat	mir para sazzat tubewell	Deep Tubewell	50	0	0	0	1	22.7604	89.2326
	70	Islamkati	Ghola	government dip	karigor para government dip	Deep Tubewell	100	0	0	0	1	22.7622	89.2309
	71	Islamkati	Ghola	ghola palli mongol tubewell	ghola palli mongol school tubewell	Shallow Tubewell	250	1	0	1	1	22.7584	89.2332
	72	Islamkati	Ghona	khan akter	khan para akter's tube well	Deep Tubewell	30	0	0	0	1	22.7529	89.2372
	73	Islamkati	Ghona	uttoron	khan para deep tube well	Deep Tubewell	20	0	0	0	1	22.746	89.233
	74	Islamkati	Ghona	shadu mondol	north ghola kanai's house	Deep Tubewell	200	0	0	0	1	22.7719	89.2315
	75	Islamkati	ghona	Ashraful ulum Kaomi Madrasa	tubewell of ghona bazar madrasa	Shallow Tubewell	150	0	0	0	1	22.7573	89.233
	76	Islamkati	Islam Kati	Sheikh Mijanur	in mijanur's house at sheikhpara	Shallow Tubewell	40	0	0	0	1	22.7585	89.2013
	77	Islamkati	Islam Kati	Jibarul Sheikh	in jibarul's house at sheikhpara	Deep Tubewell	60	0	0	0	1	22.7591	89.2002
	78	Islamkati	Islam Kati	Taimur Gazi	in taimur's house at gazipara	Shallow Tubewell	40	0	0	0	1	22.7589	89.1995
	79	Islamkati	Islam Kati	Government deep tubewell	government deep tubewell of morolopara's	Deep Tubewell	20	0	0	1	1	22.7611	89.1977
	80	Islamkati	Islam Kati	Government deep tubewell	government deep tubewell of morolopara's	Deep Tubewell	60	0	1	0	1	22.7621	89.196
	81	Islamkati	Islam Kati	sheikh rejaul	sheikh para rejaul's house	Shallow Tubewell	40	0	0	0	1	22.7588	89.2011
	82	Islamkati	Islam Kati	sarkar DTW	sardar para government DTW	Deep Tubewell	50	1	0	0	1	22.7571	89.1981
	83	Islamkati	Islam Kati	government	sheikh monirul's house side	Deep Tubewell	50	0	0	0	1	22.7581	89.199
	84	Islamkati	Islam Kati	government	west para government	Deep Tubewell	50	0	0	0	1	22.7589	89.1967
	85	Islamkati	Islam Kati	government	islam kati sardar para government	Deep Tubewell	80	0	0	0	1	22.7628	89.2025
	86	Islamkati	Islam Kati	I.B government primary school	school field	Deep Tubewell	60	0	0	0	1	22.7489	89.2033
	87	Islamkati	Islam Kati	Molla Store	in front of molla store	Shallow Tubewell	20	1	0	1	1	22.7549	89.1982
	88	Islamkati	Islam Kati	Notary office	Inside the office	Shallow Tubewell	20	0	0	1	1	22.7476	89.1962
	89	Islamkati	Islam Kati	Islam Kati Adorsho Govt. Primary School	near the bazar	Shallow Tubewell	20	0	0	1	1	22.748	89.1964
	90	Islamkati	Islam Kati	Islam kata porbotinam bohumukhi school	behind the school	Shallow Tubewell	20	1	0	1	1	22.7474	89.1966
	91	Islamkati	Islam Kati	islamkati bazar mosque	near the field	Shallow Tubewell	40	0	0	1	1	22.7466	89.1976
	92	Islamkati	Islam Kati	Government deep tubewell	government tubewell in front of the mosque	Shallow Tubewell	55	0	1	0	1	22.7628	89.1974
	93	Islamkati	Islamkati	rejaul kha	rejaul's house, kha para	Deep Tubewell	60	0	0	1	1	22.7611	89.2042
	94	Islamkati	Islamkati	gofur sordar	gofur's tube well, sordar para	Deep Tubewell	100	0	0	0	1	22.7611	89.2019
	95	Islamkati	Islamkati	government	da paran beside topon's house government tubewell	Deep Tubewell	50	0	1	0	1	22.7576	89.194
	96	Islamkati	Islamkati	government	islamkati government pond	PSF	80	0	0	0	1	22.7554	89.1958
	97	Islamkati	Islamkati	islamkati technical B.M collage	inside of collage	Shallow Tubewell	40	0	0	1	1	22.7621	89.2003
	98	Islamkati	Islamkati	islamkati govt. primary school	school field	Shallow Tubewell	20	1	0	1	1	22.7616	89.1995
	99	Islamkati	Islamkati	islamkati north para jame moshjid	moshjid para islamkati's tubewell	Shallow Tubewell	60	1	0	0	1	22.75	89.2
	100	Islamkati	Islamkati	islam kathi high school	school para islam's tubewell	Shallow Tubewell	120	1	0	0	1	22.75	89.2
	101	Islamkati	Islamkati	islamkati south para mosque	islam khati south para mosque's tubewell	Shallow Tubewell	60	1	0	0	1	22.7504	89.1999
	102	Islamkati	Kazidanga	government	government deep inside morol para	Shallow Tubewell	100	0	0	0	1	22.7663	89.2199
	103	Islamkati	Nangla	A. hakim shekh	A. hakim's tube well, shekh para	Shallow Tubewell	25	0	0	0	1	22.7361	89.2322
	104	Islamkati	Nangla	saiful morol	narna government primary school tubewell	Deep Tubewell	250	0	0	0	1	22.7385	89.2333
	105	Islamkati	Nangla	jakir rahman	jakir rahman's PSF	PSF	100	0	0	0	1	22.7415	89.2238
	106	Islamkati	Nangla	shamol krisno roy	narna bazar tubewell	Shallow Tubewell	23	0	0	1	1	22.7386	89.2337
	107	Islamkati	Narayanpur	mohitosh mollik	mollik para beside mohitosh's house	Deep Tubewell	20	0	1	0	1	22.7551	89.2277
	108	Islamkati	North Ghona	abdul hakim kha	abdul hakim kha tubewell	Deep Tubewell	100	0	0	0	1	22.7685	89.2297
	109	Islamkati	North Ghona	dolit	dolit engeneer tubewell	Deep Tubewell	60	0	0	0	1	22.762	89.2286
	110	Islamkati	Paranpur	noblok N.G.O	noblok's tube well, paranpur	Deep Tubewell	20	0	0	0	1	22.7396	89.2147
	111	Islamkati	Paranpur	golam faruk	faruk's tube well, paranpur	Deep Tubewell	30	0	0	0	1	22.7383	89.2179
	112	Islamkati	Paranpur	muslim aid	muslim aid's tube well, paranpur malo para	Deep Tubewell	20	0	0	0	1	22.7393	89.2156
	113	Islamkati	Sujansaha	bisshojit mollik	bisshojit's deep, kormokar para	Deep Tubewell	20	0	1	0	1	22.7459	89.2192
	114	Islamkati	Sujansaha	sujansaha bazaar deep tube well	deep tube well side of sujansaha bazaar	Deep Tubewell	50	0	0	0	1	22.7467	89.2235
	115	Islamkati	Sujansaha	sujansaha birdkhola primary school	sujansaha birdkhola primary school field	Deep Tubewell	50	0	0	0	1	22.7494	89.2194
	116	Islamkati	Sujansaha	rajer sor dash	rajer sor's house, north dash para	Deep Tubewell	70	0	0	0	1	22.7488	89.2168
	117	Islamkati	Sujansaha	asadul membor	asadul's house, north sordar para	Deep Tubewell	100	0	0	0	1	22.7527	89.2228
	118	Islamkati	Sujansaha	sordar ansar ali	sujansaha girls high school	Shallow Tubewell	220	0	0	1	1	22.7478	89.2234
	119	Islamkati	Sujansaha	shirani ghosh	sujansaha birdkhola primary school	Shallow Tubewell	86	0	0	1	1	22.7494	89.2193
	120	Islamkati	Sujansaha	sujansaha bazaar	sujansaha bazaar's tube well	Shallow Tubewell	40	1	0	1	1	22.7463	89.2231
	121	Islamkati	Uthali	alauddin gazi	gazi paraalauddin's tube well	Deep Tubewell	20	0	0	0	1	22.7434	89.2351
	122	Islamkati	Uthali	kamrul sheikh	sheikh para kamrul tubewell	Deep Tubewell	20	0	0	0	1	22.7413	89.2383
	123	Islamkati	Uthali	A. goffer shekh	uthali govt. primary school's tube well	Shallow Tubewell	200	0	0	1	1	22.7433	89.2386
	124	Islamkati	Uthali	kamrul sheikh	sheikh para mosque tubewell	Shallow Tubewell	25	0	0	1	1	22.7412	89.2385
	125	Islamkati		government	jala para aru sarder's fild	Deep Tubewell	50	0	0	0	1	22.7741	89.2282
	126	Islamkati		85no gov't primary school	85no gov't primary school's tubewell	Deep Tubewell	110	0	0	0	1	22.7697	89.2254
	127	Islamkati		protik trast	dinesh mondal home	Shallow Tubewell	40	0	0	0	1	22.7753	89.2262
	128	Islamkati		nirala atim khana	atim khana's tubewell	Shallow Tubewell	28	1	0	1	1	22.7403	89.2336
	129	Islamkati		eibaidul rahaman	eibaidul rahaman's tubewell	Shallow Tubewell	50	0	0	0	1	22.7411	89.2339
	130	Jalalpur	Atghara	mondir	atghara side of mondir	Deep Tubewell	30	0	0	1	1	22.7126	89.282
	131	Jalalpur	Atlia	government diip	besides the mosque government dip tubewell	Deep Tubewell	20	0	0	0	1	22.701	89.2401
	132	Jalalpur	Atlia	government primary school	east para besides of primary school	Deep Tubewell	100	0	0	0	1	22.6975	89.2402
	133	Jalalpur	Atlia	mosque	east para market besides of mosque	Shallow Tubewell	20	0	0	1	1	22.6976	89.2405
	134	Jalalpur	Char Kanaidia	shomilon	sheikh para tubewell besides of the river	Deep Tubewell	30	0	0	0	1	22.6998	89.286
	135	Jalalpur	CharÃ¡Kanaidia	murari boshu	side of chairman's house	Shallow Tubewell	20	0	0	1	1	22.702	89.282
	136	Jalalpur	dohar	sohorap sardar	west sardar para	Deep Tubewell	100	0	0	0	1	22.6967	89.2314
	137	Jalalpur	dohar	mofej master	sardar para	PSF	200	0	0	0	1	22.6978	89.234
	138	Jalalpur	Jalalpur	nironjon ghosh	jalalpur ghosh para	PSF	20	0	0	0	1	22.7074	89.2554
	139	Jalalpur	Jalalpur	jonosastho prokousol odhidoptor	pond side of school field	PSF	20	0	0	0	1	22.6989	89.2573
	140	Jalalpur	Jalalpur	jalalpur mondir	jalalpur cauncill's south side	Shallow Tubewell	20	0	0	1	1	22.707	89.2584
	141	Jalalpur	Jalalpur	jalalpur dakshin para jame moshjid	jalalpur dakshin para jame moshjid	Shallow Tubewell	80	0	0	1	1	22.7037	89.2528
	142	Jalalpur	Jalalpur	jalalpur school	jalalpur school	Shallow Tubewell	20	1	0	1	1	22.6991	89.2574
	143	Jalalpur	Jetua	moshlem gazi	jetua purbo para last area gazi para	Deep Tubewell	70	0	0	0	1	22.7094	89.278
	144	Jalalpur	Jetua	moshjid	side of moshjid	Deep Tubewell	70	1	0	0	1	22.7101	89.2756
	145	Jalalpur	Jetua	sarkar	end of north sheikh para	Deep Tubewell	200	0	0	0	1	22.7245	89.2643
	146	Jalalpur	Jetua	saukat master	east fakir para	Deep Tubewell	100	0	0	0	1	22.7285	89.2569
	147	Jalalpur	Jetua	sheikh paea maszid	sheikh para	Deep Tubewell	30	0	0	0	1	22.7244	89.2575
	148	Jalalpur	Jetua	sarkari	besides the madrasaa	Shallow Tubewell	25	0	0	0	1	22.7234	89.2617
	149	Jalalpur	Jetua	panjakhana mosque	road side mosque	Deep Tubewell	20	0	0	0	1	22.7126	89.2702
	150	Jalalpur	Jetua	mohammad ali sardar	sardar para	Deep Tubewell	30	0	0	0	1	22.7188	89.2762
	151	Jalalpur	Jetua	government DTW	sardar para	Shallow Tubewell	20	1	0	1	1	22.7218	89.2706
	152	Jalalpur	Kanaidia	amrokanon dakhil madrasa	amrokanon dakhil madrasa	Deep Tubewell	50	0	0	0	1	22.7027	89.2868
	153	Jalalpur	Kanaidia	government	bara kanaidia molla para	Deep Tubewell	50	0	0	0	1	22.6909	89.2986
	154	Jalalpur	Kanaidia	deep tube well	east kanaidia	Deep Tubewell	100	0	0	0	1	22.6939	89.3018
	155	Jalalpur	Kanaidia	Government	beside mondir	Deep Tubewell	20	0	0	0	1	22.7	89.3006
	156	Jalalpur	Kanaidia	shripod haldar	west side of bara kanaidia	Deep Tubewell	30	0	0	1	1	22.7058	89.2921
	157	Jalalpur	Kanaidia	Government tube well	kanaidia bazaar tube well	Deep Tubewell	60	0	0	0	1	22.7012	89.2948
	158	Jalalpur	Kanaidia	UNISEF	nath para square deep tube well	Deep Tubewell	20	0	0	0	1	22.7024	89.2966
	159	Jalalpur	Kanaidia	Government	govt. school field	Deep Tubewell	20	1	0	1	1	22.695	89.2974
	160	Jalalpur	Kanaidia	Government	east kanaidia gazi para	Deep Tubewell	50	0	0	0	1	22.6926	89.303
	161	Jalalpur	Kanaidia	jadon shadh	west side of bara kanaidia side of mondir	Shallow Tubewell	20	0	0	0	1	22.7053	89.2916
	162	Jalalpur	Kanaidia	rofiq gazi	east kanaidia gazi para	Shallow Tubewell	20	0	0	1	1	22.6926	89.3027
	163	Jalalpur	Kanaidia	amir morol	east kanaidia sordar para	Shallow Tubewell	30	0	0	1	1	22.6907	89.3032
	164	Jalalpur	Krishnakati	md. mesbahur rahman morol	front side of chairman's house	Deep Tubewell	50	1	1	0	1	22.7022	89.2833
	165	Jalalpur	Krishnakati	debula dash	krishnakati dash para	Shallow Tubewell	40	0	0	0	1	22.7096	89.2878
	166	Jalalpur	Nehalpur	mondir pakkhi	besides nehalpur temple	Deep Tubewell	50	0	0	1	1	22.7302	89.2578
	167	Jalalpur	Nehalpur	government	end of nehalpur	Shallow Tubewell	20	0	0	0	1	22.7273	89.262
	168	Jalalpur	Rathkhola	government	side of market	Deep Tubewell	30	1	0	1	1	22.7016	89.2939
	169	Jalalpur	Sreemanta Kati	monronjon biswas	side of sreemanta Kati old bazaar	Shallow Tubewell	20	0	0	1	1	22.6954	89.2574
	170	Khalilnagar	Boro kasim pur	Shek sahin	Beside of Dakshin para	Shallow Tubewell	200	1	0	1	1	22.7241	89.1684
	171	Khalilnagar	Boro kasim pur	Abu taher	Beside of Dakshin para	Shallow Tubewell	20	1	0	1	1	22.7232	89.1663
	172	Khalilnagar	Dakshin Nalta	jillu rahman	beside the road	Deep Tubewell	20	0	0	0	1	22.729	89.2774
	173	Khalilnagar	Dakshin Nalta	munsur sordar	beside swamp	Deep Tubewell	30	0	0	0	1	22.7294	89.2792
	174	Khalilnagar	Dakshin Nalta	sokhina biswas	beside road	Deep Tubewell	100	0	0	1	1	22.7304	89.2737
	175	Khalilnagar	Dakshin Nalta	bishnu bishwas	side of market	Deep Tubewell	55	0	0	0	1	22.7256	89.2756
	176	Khalilnagar	Dakshin Nalta	monjurul biswas	beside road	Shallow Tubewell	200	0	0	1	1	22.7279	89.2767
	177	Khalilnagar	Dakshin Nalta	amzad sorder	gazi para	Shallow Tubewell	100	1	0	1	1	22.7311	89.2783
	178	Khalilnagar	Dakshin Nalta	majar mosque		Shallow Tubewell	20	0	0	1	1	22.7287	89.2736
	179	Khalilnagar	Dakshin Nalta	somesh sorder	gazi para	Shallow Tubewell	20	1	0	0	1	22.7312	89.2704
	180	Khalilnagar	Fatehpur	Government	fatehpur ghosh para deep tube well	Deep Tubewell	20	0	0	0	1	22.7548	89.2804
	181	Khalilnagar	Gangarampur	moshjid committee	south side of main road moshjid's tube well	Shallow Tubewell	50	0	0	1	1	22.7198	89.2871
	182	Khalilnagar	Gangarampur	madrasa's tube well	south side of road madrasa's tube well	Shallow Tubewell	30	0	0	1	1	22.7154	89.2935
	183	Khalilnagar	Gangarampur	moshjid committee	moshjid committee's tube well	Shallow Tubewell	20	0	0	0	1	22.7184	89.2921
	184	Khalilnagar	Gonali	Gonali mosque	beside the road	Deep Tubewell	20	0	0	0	1	22.738	89.2784
	185	Khalilnagar	Gonali	jogudas	gonali mondir	Shallow Tubewell	40	0	0	1	1	22.7352	89.2729
	186	Khalilnagar	Gonali	Government	Beside road in a building	Deep Tubewell	100	0	0	0	1	22.7323	89.2753
	187	Khalilnagar	Gonali	nironjon sorkar	beside baptist school	Shallow Tubewell	40	0	0	1	1	22.7356	89.2732
	188	Khalilnagar	Hajrakati	government	near the road , left of shubha houses chandra's	Deep Tubewell	30	0	0	0	1	22.7638	89.2824
	189	Khalilnagar	Hajrakati	masjid	beside brick road	Deep Tubewell	20	0	0	0	1	22.7629	89.2798
	190	Khalilnagar	Hajrakati	morol para united tubewell	morol para behind tasewr gazi house	Deep Tubewell	100	0	0	0	1	22.7628	89.283
	191	Khalilnagar	Hajrakati	hajrakati primary school	Hajrakati primary school tubewell	Deep Tubewell	50	0	0	0	1	22.7586	89.2796
	192	Khalilnagar	Hajrakati	md. abu bakkar	eid gah tubewell	Deep Tubewell	70	0	0	1	1	22.7625	89.2776
	193	Khalilnagar	Hajrakati	government	tubewell infront of kohinoor morols house	Deep Tubewell	100	0	0	0	1	22.7602	89.2807
	194	Khalilnagar	Hajrakati	abdur rob	west of hazrakati bazaar	Shallow Tubewell	60	1	0	0	1	22.7638	89.2787
	195	Khalilnagar	Harischandra Kati	government (DTW)	Harischandra kati ghosh para	Deep Tubewell	30	0	0	0	1	22.7469	89.2756
	196	Khalilnagar	Harischandra Kati	somaj kollan office	Harischandra kati , infront of eidgah	Deep Tubewell	50	0	0	1	1	22.7397	89.27
	197	Khalilnagar	Harischandra kati	Gonani Chaild's Sponsership	Harishchandrakati mission office	Deep Tubewell	70	0	0	0	1	22.7348	89.2723
	198	Khalilnagar	Harischandra kati	West Para Mosque	West para mosque	Shallow Tubewell	30	0	0	1	1	22.7403	89.2673
	199	Khalilnagar	Harischandra kati	Mission Office	Gonani mission office	Shallow Tubewell	30	1	0	0	1	22.7349	89.2725
	200	Khalilnagar	Harischandra kati	Government	Sardar para	Shallow Tubewell	20	0	0	0	1	22.7335	89.2711
	201	Khalilnagar	Khalilnagar	deep tube well	besides minarul kha, kha para	Deep Tubewell	100	0	1	0	1	22.7271	89.2894
	202	Khalilnagar	Khalilnagar	md. kayem kha	poschim para, kayem kha's house	Deep Tubewell	30	0	0	1	1	22.7291	89.2942
	203	Khalilnagar	Khalilnagar	shopon kumar	kholilnogor bajar	Deep Tubewell	30	0	0	0	1	22.7329	89.2964
	204	Khalilnagar	Khalilnagar	government tubewel	personal tubewel	Shallow Tubewell	40	0	0	0	1	22.7232	89.3001
	205	Khalilnagar	Khalilnagar	Government Tubewell	East Sheikh para, beside Malek Sheikh's house	Deep Tubewell	20	0	0	1	1	22.7259	89.2971
	206	Khalilnagar	Khalilnagar	Deep tubewell	Sardarpara, beside Alamin Sardar's house	Deep Tubewell	30	1	0	0	1	22.7296	89.2917
	207	Khalilnagar	Khalilnagar	Deep Tubewell	Kapali para Biswajit Mondol's tubewell	Deep Tubewell	50	0	0	0	1	22.7271	89.293
	208	Khalilnagar	Khalilnagar	mukundra ray	mukundra ray's tube well	PSF	100	0	0	0	1	22.7293	89.295
	209	Khalilnagar	Khalilnagar	ohed ali mollah	north side of khalilnagar market	Shallow Tubewell	30	0	0	1	1	22.7333	89.2962
	210	Khalilnagar	Khalilnagar	onju deb	purbo para	Shallow Tubewell	20	0	0	1	1	22.7224	89.3031
	211	Khalilnagar	Khalilnagar	amzad golder	gold's bazar2	Shallow Tubewell	200	0	0	1	1	22.7302	89.2974
	212	Khalilnagar	Khalilnagar	saifullah	personal tubewel	Shallow Tubewell	20	0	0	0	1	22.732	89.2973
	213	Khalilnagar	Machhiara	dakhil madrasa	dakshin para	Deep Tubewell	100	0	0	0	1	22.7189	89.3127
	214	Khalilnagar	Machhiara	government	gazi para front side of moshjid	Deep Tubewell	50	0	1	0	1	22.7264	89.3139
	215	Khalilnagar	Machhiara	robiul islam par	nur ani amdrasa's tube well	Shallow Tubewell	20	1	0	1	1	22.7239	89.3146
	216	Khalilnagar	Machioara	Dhokhin maciara dolit school	Beside of Dakshin para	Deep Tubewell	100	1	0	1	1	22.7169	89.3096
	217	Khalilnagar	Madiyara	Kali Badi	Uttar Para Kali Badir Pashe	Deep Tubewell	100	0	0	0	1	22.7357	89.3124
	218	Khalilnagar	Mahandi	roshid membar govt. tubewell	sheikh para near the road	Deep Tubewell	30	0	0	1	1	22.7547	89.2839
	219	Khalilnagar	Mahandi	sheikh robiul islam	mahandi sheikh para	Deep Tubewell	30	1	0	0	1	22.7494	89.2889
	220	Khalilnagar	Mahandi	ashadul morol	purbo para ashadul morol house	Shallow Tubewell	20	0	0	0	1	22.7513	89.2939
	221	Khalilnagar	Mahandi	mosque	purba para mosque mahandi	Shallow Tubewell	35	0	0	1	1	22.7512	89.289
	222	Khalilnagar	Nurullapur	government	infront of milon das house	Deep Tubewell	20	0	0	0	1	22.754	89.2749
	223	Khalilnagar	Nurullapur	subhas chandra das	subhas chandras tubewell	PSF	60	0	0	0	1	22.7559	89.2755
	224	Khalilnagar	Prasadpur	government tubewel	personal	Deep Tubewell	30	0	0	0	1	22.7293	89.3028
	225	Khalilnagar	Prasadpur	government tubewel		Deep Tubewell	20	0	0	1	1	22.7317	89.3016
	226	Khalilnagar	Raipur	Raipur Sarkari Prathomik Biddaloy	Raipur Government Primary School	Deep Tubewell	20	1	1	1	1	22.7171	89.3245
	227	Khalilnagar	Raypur	Sorkari	Thakur Barir Pase	PSF	20	0	0	0	1	22.7204	89.3209
	228	Khalilnagar	Uttar Nalta	somor sorkar	personal tubewel	Deep Tubewell	20	0	0	1	1	22.7349	89.2886
	229	Khalilnagar	Uttar Nalta	imon sordar	imon sordar's tube well	Shallow Tubewell	20	1	0	1	1	22.7442	89.2863
	230	Khalilnagar	Uttar Nalta	motail rahman seikh	motiar rahman's tube well	Shallow Tubewell	20	1	0	1	1	22.7448	89.2847
	231	Khalilnagar	Uttar nolota	Nolota primary nolkup	Nolota primary ghovir nolkup	Deep Tubewell	50	0	0	0	1	22.7379	89.2886
	232	Khalishkhali	Baukhola	sheikh sajidul islam	sajidul's tubewell,sheikh para	Deep Tubewell	20	0	0	1	1	22.7473	89.2142
	233	Khalishkhali	Baukhola	government tubewell	government tubewell,baukhola	Deep Tubewell	30	0	0	1	1	22.747	89.2153
	234	Khalishkhali	Boyar danga	Boyar Danga Primary School	Boyar danga primary school	Deep Tubewell	100	0	0	1	1	22.7094	89.1916
	235	Khalishkhali	Boyar danga	Asadur Rahman Gazi	In gazi para	PSF	112	0	0	1	1	22.7111	89.1895
	236	Khalishkhali	Boyardangga	morol para mosque	morol para mosque tubewell	Shallow Tubewell	58	0	0	1	1	22.7136	89.1897
	237	Khalishkhali	Dhudli	government pond	dhudli gazi para P.M.F	PSF	500	0	0	0	1	22.7168	89.1827
	238	Khalishkhali	Dhukria	Suvas Sarker	In south para	Deep Tubewell	20	0	0	0	1	22.6919	89.1961
	239	Khalishkhali	Dudlai	Government deep tube well	government deep tube well north para	Deep Tubewell	20	0	1	0	1	22.7189	89.1765
	240	Khalishkhali	Goneshpur	gazi para mosque	gonesh middle of gazi para	Shallow Tubewell	30	0	0	1	1	22.7356	89.1891
	241	Khalishkhali	Gopalpur	barun de	gopalpur barun's tubewell	Deep Tubewell	20	0	0	0	1	22.7477	89.2462
	242	Khalishkhali	Kadikati	Mosque'S Tubewell	Mosque's tubewell in gazi para	Shallow Tubewell	30	0	0	1	1	22.7391	89.1809
	243	Khalishkhali	Kahalishkhali	High Scholl Tubewell	School's tubewell, Uttorpara	Shallow Tubewell	300	0	0	1	1	22.731	89.1858
	244	Khalishkhali	Katakhali	Kadikati Mission	Kadikati mission in rishi para	Deep Tubewell	50	0	0	0	1	22.7429	89.1843
	245	Khalishkhali	Katakhali	Jhoshilpi School	jhoshilpi school in rishi para	Shallow Tubewell	40	0	0	1	1	22.7427	89.1838
	246	Khalishkhali	Kathakhali	Hiru Mandol	Hiru mandol's tubewell in choitonno math of kathakhali	Deep Tubewell	50	0	0	0	1	22.7563	89.1862
	247	Khalishkhali	Kathakhali	Katakhali Mosque	Mosque's tubewell of katakhali	Deep Tubewell	50	0	0	0	1	22.7526	89.1901
	248	Khalishkhali	Khalish Khali	Government	government deep tubewell of kundupara	Deep Tubewell	30	0	1	1	1	22.7207	89.1924
	249	Khalishkhali	khalish khali	primary school	west para,primary school dip tubewell	Deep Tubewell	30	0	1	0	1	22.7235	89.1847
	250	Khalishkhali	khalish khali	rasul gazi	east para, rasul gazi's dip tubewell	Deep Tubewell	20	0	0	1	1	22.7188	89.1919
	251	Khalishkhali	khalish khali	government	government's tubewell,paul para	Deep Tubewell	20	0	1	0	1	22.7144	89.1859
	252	Khalishkhali	khalish khali	government	government's tubewell,ash para	Deep Tubewell	20	1	0	1	1	22.7108	89.1847
	253	Khalishkhali	Khalish Khali	muntaj doctor	muntaj P.S.F, chowdhury para	PSF	30	0	0	0	1	22.7252	89.1841
	254	Khalishkhali	khalish khali	mosque committee	west para,mosque's tubewell	Shallow Tubewell	50	0	0	1	1	22.7261	89.1856
	255	Khalishkhali	kholishkhali	Govt.	In rishi para	Deep Tubewell	100	0	0	0	1	22.7407	89.1835
	256	Khalishkhali	Krishnanogor	Govt. Tubewell	Behind school	Deep Tubewell	20	1	0	1	1	22.6907	89.1736
	257	Khalishkhali	Mokolondo Kati	sheikh abdul hamid	sheikh abdul hamid tubewell sheikh para	Deep Tubewell	30	0	0	0	1	22.7159	89.1992
	258	Khalishkhali	Mokolondo Kati	mokolondo kati primary school	mokolondo kati primary school	Shallow Tubewell	40	0	0	0	1	22.715	89.1838
	259	Khalishkhali	Mokolondo Kati	jonosokti kormosongstan training	jonosokti kormosongstan training	Shallow Tubewell	20	0	0	1	1	22.717	89.1907
	260	Khalishkhali	Mokolondo Kati	mokolondo kati primary school	mokolondo kati primary school	Shallow Tubewell	40	1	0	1	1	22.7151	89.1835
	261	Khalishkhali	Moksudpur	Para Committee	Government deep tubewell in das para	Shallow Tubewell	100	0	1	1	1	22.7469	89.182
	262	Khalishkhali	Mongolanondo Kati	government tubewell	besides morol para government dip tubewell	Deep Tubewell	50	0	0	1	1	22.7169	89.1934
	263	Khalishkhali	Mongolanondo Kati	sheikh mongol	sheikh para mongol tubewell	Shallow Tubewell	40	0	0	1	1	22.717	89.1934
	264	Khalishkhali	Pakshia	Govt. Tubewell	Govt. tubewell	Shallow Tubewell	40	0	0	1	1	22.71	89.1974
	265	Khalishkhali	Pakshia	Govt. Tubewell	Beside habibur's house	Shallow Tubewell	28	0	0	1	1	22.7123	89.2001
	266	Khalishkhali	Shuktia	Govt.	In mandol para	Deep Tubewell	70	0	0	0	1	22.7048	89.1795
	267	Khalishkhali	Sujon Shah	government dip	sardar para government dip	Deep Tubewell	20	0	0	0	1	22.7457	89.2151
	268	Khalishkhali	Tikarampur	Govt. Deep Tubewell	In tikarampur	Deep Tubewell	50	0	0	0	1	22.708	89.1867
	269	Khalishkhali	Tikarampur	Tikrampur Primary School	In tikarampur	Deep Tubewell	50	0	1	0	1	22.6999	89.185
	270	Khalishkhali	Tikarampur	Govt.	In jele para	Deep Tubewell	20	0	1	0	1	22.7047	89.1795
	271	Kheshra	Balia	mosque		Shallow Tubewell	100	0	0	0	1	22.6523	89.2375
	272	Kheshra	Baliya	Baleya Govt. Primary School	Bishash Para Govet Primary School	Deep Tubewell	30	0	0	0	1	22.6659	89.2627
	273	Kheshra	Baliya	Akter Sorkar	Akter Sorka's tubewell	Shallow Tubewell	300	1	0	1	1	22.6675	89.2614
	274	Kheshra	Baliya	Kholil Morol	Kholil Morol's house's tubewell	Shallow Tubewell	20	1	0	1	1	22.6734	89.2566
	275	Kheshra	Baliya	Shajdat Ali Morol	Shajdat Ali Morol's tubewell	Shallow Tubewell	100	1	0	1	1	22.6721	89.2584
	276	Kheshra	Baliya	Baleya Jame Mosjid	Gazi Para Mosjit	Shallow Tubewell	25	0	0	1	1	22.6698	89.2587
	277	Kheshra	Baliya	Baleya Mosjid	Bishash Para Mosque	Shallow Tubewell	20	0	0	1	1	22.6658	89.2627
	278	Kheshra	Batuyadanga	Primary School	Primary school	Shallow Tubewell	82	1	0	1	1	22.6646	89.1853
	279	Kheshra	Dakshin Shahapur	Md. Abdus-Sattar Morol	South Shapur Govt. Primary School	Shallow Tubewell	150	0	0	0	1	22.6431	89.2234
	280	Kheshra	Dumuria	school		Shallow Tubewell	50	0	0	1	1	22.639	89.2742
	281	Kheshra	Dumuria	school		Shallow Tubewell	50	0	0	1	1	22.6549	89.2741
	282	Kheshra	Dumuria	mojibor rahman		Shallow Tubewell	200	0	0	1	1	22.6558	89.2782
	283	Kheshra	Harihar Nagar	bazar		Shallow Tubewell	300	0	0	0	1	22.6462	89.2363
	284	Kheshra	Honirkhola	Rajnagar Chok School	Biswas's Chok Rajnagar Primary School	Shallow Tubewell	30	1	0	1	1	22.6695	89.1946
	285	Kheshra	Honirkhola	Miloni School	Miloni Primary School	Shallow Tubewell	150	1	0	1	1	22.6674	89.1749
	286	Kheshra	Horihar Nagar	Sardar Para Mosque	Sardar Para Jame Mosqu's tubewell	Shallow Tubewell	50	0	0	1	1	22.6497	89.2337
	287	Kheshra	Horihar Nagar	Mosque	Goldar Para Mosqu's tubewell	Shallow Tubewell	90	0	0	0	1	22.651	89.2391
	288	Kheshra	Horihar Nagar	H.M High School	Horihar Nogor H.M.S High School's tubewell	Shallow Tubewell	250	1	0	1	1	22.648	89.2381
	289	Kheshra	Horihar Nagar	Horihar Nogor H.M.S High School	Horihar Nogor H.M.S High School's tubewell	Shallow Tubewell	250	0	0	0	1	22.6483	89.2384
	290	Kheshra	Horihar Nagar	Horihar Nogor Hafizia Madrasa	Horihar Nogor Hafizia Madrasa Field's tubewell	Shallow Tubewell	150	0	0	0	1	22.6489	89.2391
	291	Kheshra	Horinkhola	Oshi	Sorkar Para	PSF	100	0	0	0	1	22.6659	89.1751
	292	Kheshra	Khesra	Sunil Kumar Das	Sonil Dash's houser's tubewell	PSF	200	0	0	0	1	22.6381	89.2718
	293	Kheshra	Khesra	Leyakot Chairman	Leyakot Chairman's P.S.F	PSF	400	0	0	0	1	22.6463	89.2788
	294	Kheshra	Khesra	bayezid		Shallow Tubewell	40	0	0	1	1	22.6529	89.2782
	295	Kheshra	Khesra	malipara		Shallow Tubewell	50	0	0	1	1	22.649	89.2783
	296	Kheshra	Khesra	Mondir	West Para Beside The Rood Mondir's tubewell	Shallow Tubewell	30	0	0	1	1	22.6443	89.2681
	297	Kheshra	Khesra	Poja Mondir	Das Para Poja Mondir's tubewell	Shallow Tubewell	100	0	0	1	1	22.639	89.2745
	298	Kheshra	Mithabari	tohidur rahman	personal tubewel	Deep Tubewell	20	0	0	0	1	22.7736	89.1232
	299	Kheshra	Muragasa		Beside the Govt. pond	Shallow Tubewell	70	0	0	0	1	22.6555	89.2438
	300	Kheshra	Rajapur	Uttoran	Deep tubewell in basar para	Deep Tubewell	20	0	0	0	1	22.6509	89.1893
	301	Kheshra	Sahapur	Mosque	East of Notun Bazar	Shallow Tubewell	100	0	0	1	1	22.6464	89.2303
	302	Kheshra	Sahazatpur	Madrasha	Shahajadpur Madrasha's tubewell	Shallow Tubewell	250	0	0	1	1	22.6396	89.2819
	303	Kheshra	Sahazatpur	Shohidul Morol	Shahajadpur Bazar's tubewell	Shallow Tubewell	150	0	0	1	1	22.6404	89.2815
	304	Kheshra	Sahazatpur	Shohidul Morol	Shahajadpur Bazar's tubewell	Shallow Tubewell	100	0	0	1	1	22.6399	89.2812
	305	Kheshra	Sahazatpur	Sana Para Mosjid	Sana Para Mosque	Shallow Tubewell	50	0	0	1	1	22.6491	89.2826
	306	Kheshra	Shahapur	Lavlu Gazi	Gazi para	PSF	50	0	0	0	1	22.6439	89.2274
	307	Kheshra	Shahapur	Orkabi	Gazi para	Shallow Tubewell	200	0	0	1	1	22.6438	89.2286
	308	Kheshra	Shahapur	Alia Marod Gazi	Alia marod gazi	Shallow Tubewell	300	0	0	1	1	22.6442	89.2289
	309	Kheshra	Shahjadpur	school		Deep Tubewell	100	0	1	1	1	22.6505	89.279
	310	Kheshra	Shahjadpur	school		Deep Tubewell	100	0	0	0	1	28.4631	0
	311	Kheshra	Shahjadpur	high school		Shallow Tubewell	20	0	0	1	1	22.6465	89.2803
	312	Kheshra	Shahjadpur	rozob sorder		Shallow Tubewell	200	1	0	0	1	22.6501	89.2769
	313	Kheshra	Shahjadpur	jamal morol		Shallow Tubewell	50	0	0	1	1	22.6399	89.2736
	314	Kheshra	Shalikha	Bidhan Chondro Shadhu	Shalikha college's tubewell	Shallow Tubewell	35	1	0	1	1	22.6589	89.2485
	315	Kheshra	Shalikha	Tushar Kanti Mitro	Sholika Guccho Gram Sarkari Primary School	Shallow Tubewell	125	0	0	1	1	22.6602	89.2511
	316	Kheshra	Teghoria	Primary School	Primary School	Deep Tubewell	350	0	1	1	1	22.6755	89.256
	317	Kheshra	Teghoria	Primary School	Primary School	Shallow Tubewell	120	0	0	1	1	22.6754	89.256
	318	Kheshra	Uttor Sahazatpur	Govt.'s Tubewell	Shahadat Pur Pubali Para Govt's tubewell	Deep Tubewell	200	0	0	0	1	22.6485	89.2839
	319	Kumira	Abhaytala	Governmentel Primary School	Governmentel Primary School	Deep Tubewell	50	0	0	1	1	22.7937	89.1826
	320	Kumira	Abhaytala	Shujayey Master	Shekh para Shujayet master's tubewell	Deep Tubewell	50	0	0	1	1	22.7949	89.1817
	321	Kumira	Abhaytala	abu bokkar shekh	abu bokkar's tube well, shekh para	Shallow Tubewell	40	0	0	0	1	22.7944	89.1835
	322	Kumira	Baksia	iman ali morol	front side of iman ali's house morol para	Deep Tubewell	20	0	0	0	1	22.7811	89.1957
	323	Kumira	Dadpur	mosque kometi	south could Mosque's dip tubewell	Shallow Tubewell	40	0	0	1	1	22.8	89.1802
	324	Kumira	Dadpur	Abdul Rahman shekh	Shekh Para Rahman's tubewell	Deep Tubewell	30	0	0	1	1	22.803	89.1865
	325	Kumira	Dadpur	Governmentel tubewell	Governmentel tubewell side by Motiur Shekh house	Deep Tubewell	30	0	0	1	1	22.8031	89.1878
	326	Kumira	Dadpur	Governmental	South could Governmental tubewell	Shallow Tubewell	50	0	0	1	1	22.8003	89.181
	327	Kumira	Dadpur	Khan para Mosjid tubewell	East Khan Para Mosque tubewell	Shallow Tubewell	20	1	0	1	1	22.8023	89.1882
	328	Kumira	Gauripur	Kaji Abdul Hai	Kaji para Abdul's Dip tubewell	Deep Tubewell	20	0	0	0	1	22.8028	89.1962
	329	Kumira	Gauripur	Dip tubewell Kaji para	Dip tubewell Kaji para	Shallow Tubewell	40	0	0	0	1	22.8043	89.1972
	330	Kumira	Gauripur	Dip tubewell	Sardar para Dip tubewell	Shallow Tubewell	25	0	0	0	1	22.8035	89.1976
	331	Kumira	Kayemkhola	Babulal Mondol	Kayemkhola Babulal Mondol's House	Deep Tubewell	50	0	0	0	1	22.7739	89.1837
	332	Kumira	Kayemkhola	4 no Kumira Union Porishod	Kayemkhola 4 no Kumira Union	Shallow Tubewell	40	0	0	0	1	22.7718	89.1988
	333	Kumira	Kumira	Sarkari tube well	Sarkari gobhir nolkup	Deep Tubewell	50	0	0	1	1	22.7846	89.1741
	334	Kumira	Kumira	sarkari	sarkar's tube well	Deep Tubewell	20	0	1	0	1	22.7697	89.176
	335	Kumira	Kumira	Rezaul karim sardar	karim's tube well	Shallow Tubewell	40	0	0	0	1	22.786	89.1768
	336	Kumira	Kumira	Lari para sarkara prathomikk biddaloy	Biddaloy's tube well	Deep Tubewell	30	0	0	0	1	22.7881	89.1722
	337	Kumira	Kumira	Pilot maddhomik biddaloy	Pilot biddaloy	Deep Tubewell	100	0	0	0	1	22.7701	89.1776
	338	Kumira	Kumira	Goutom bhattacharjo	Goutom 's deeo tube well	Deep Tubewell	65	0	0	0	1	22.7645	89.1748
	339	Kumira	Kumira	Monorongon sarma	monoronjon's house	Deep Tubewell	100	0	0	0	1	22.7647	89.1793
	340	Kumira	Kumira	Government	Government's tubewell in south para of kumira	Deep Tubewell	20	0	1	0	1	22.7576	89.1786
	341	Kumira	Kumira	Mojibar Shekh	Mojibor shekh's tubewell in sehekh para	Deep Tubewell	150	0	0	1	1	22.7852	89.1784
	342	Kumira	Kumira	A. Ajij Molla	Ajij molla's tubewell in molla para	Deep Tubewell	80	0	0	1	1	22.7814	89.1745
	343	Kumira	Kumira	Ad. Ruhul Amin	Ruhul amin's tubewell	Deep Tubewell	50	0	0	1	1	22.7806	89.1729
	344	Kumira	Kumira	Md. Motiar Rahman	Motiar's tubewell in kodom tola bazar	Deep Tubewell	20	0	0	0	1	22.7691	89.1765
	345	Kumira	Kumira	Robiul	Robiul's deep tubewell in south para	Shallow Tubewell	25	0	0	0	1	22.7646	89.1789
	346	Kumira	Kumira	Robiul Islam Biswas	Front of robiul's house in south para	Deep Tubewell	30	0	0	0	1	22.7645	89.1788
	347	Kumira	Kumira	masjid's tube well	masjjid's tube well	Shallow Tubewell	30	0	0	1	1	22.787	89.1768
	348	Kumira	Kumira	Mohila degree college	Degree college 's bhitor	Shallow Tubewell	100	0	1	1	1	22.7704	89.1793
	349	Kumira	Kumira	Kumira pilot school	Kumira pilot school	Shallow Tubewell	100	0	1	1	1	22.7703	89.1772
	350	Kumira	Kumira	Kumira pilot school	Kumira pilot school	Shallow Tubewell	50	0	0	1	1	22.7705	89.1775
	351	Kumira	Kumira	Kumira pilot school	Kumira pilot school	Shallow Tubewell	100	0	1	1	1	22.7704	89.1771
	352	Kumira	Kumira	kumira bazaar's tube well	kumira bazaar's tube well	Shallow Tubewell	40	1	0	1	1	22.7685	89.1718
	353	Kumira	Kumira	Md. Nur Ali Gazi	Nur ali's tubewell iin kumira sobuj polli	Shallow Tubewell	20	1	0	1	1	22.7665	89.1699
	354	Kumira	Manoharpur	barat manoharpur school	school tube well barat manoharpur	Deep Tubewell	20	0	1	0	1	22.7729	89.1981
	355	Kumira	Mirzapur	Atiar sardar	atiar's tube well	Shallow Tubewell	20	0	1	0	1	22.7781	89.2057
	356	Kumira	Mohammadpur	Hosen Ali Shekh	Shekh para Hosen's tubewell	Deep Tubewell	50	0	0	0	1	22.7945	89.1964
	357	Kumira	Monohorpur	Sarkari	Masjid 's deep tube well	Deep Tubewell	100	0	0	0	1	22.7694	89.1964
	358	Kumira	Monohorpur	Government Tubewell	Government tubewell beside das para	Shallow Tubewell	25	0	0	1	1	22.7683	89.1996
	359	Kumira	Monohorpur	Government Tubewell	Government tubewell in sarder para	Deep Tubewell	45	0	0	1	1	22.7694	89.2018
	360	Kumira	Mrizapur	Government deep tube well	government deep tube well, poshchim para	Deep Tubewell	20	0	1	0	1	22.7844	89.2054
	361	Kumira	Mrizapur	amal kanti ghosh	amalkanti ghosh's deep tube well, purbo para	Deep Tubewell	20	0	1	0	1	22.7803	89.2089
	362	Kumira	Rari Para	Haren bisswas	Haren's tube well	Deep Tubewell	60	0	0	1	1	22.7916	89.1704
	363	Kumira	Rari Para	Ratan de	ratan's tube well	Deep Tubewell	30	0	0	0	1	22.7921	89.1703
	364	Kumira	Rari Para	Sarkari tube well	Sarkari tube well	Deep Tubewell	40	0	0	0	1	22.7897	89.1766
	365	Kumira	Rari Para	Government tube well	west pal para	Deep Tubewell	103	0	0	1	1	22.789	89.1737
	366	Kumira	Rari Para	proshanto pal	west pal para	Deep Tubewell	45	0	0	1	1	22.7892	89.1743
	367	Kumira	Rari Para	nironjon pal	pal para	Deep Tubewell	50	0	0	1	1	22.789	89.1745
	368	Kumira	Rari Para	achinto dash	side of puja mondop	Deep Tubewell	50	0	0	1	1	22.7899	89.1736
	369	Kumira	Rari Para	Government tube well	government's tube well hajam para	Deep Tubewell	40	0	0	0	1	22.7933	89.175
	370	Kumira	Rari Para	swadesh dash	swadesh's tube well dash para	Deep Tubewell	40	0	0	0	1	22.7923	89.1748
	371	Kumira	Senpur	Moshiyar Shekh	East Shenpur	Deep Tubewell	30	0	0	1	1	22.8092	89.1691
	372	Kumira	Senpur	Shenpur Sardar par Mosque	East Shenpur Mopsque	Deep Tubewell	100	0	0	1	1	22.8131	89.1844
	373	Kumira	Senpur	Bablu Shekh	East Shenpur	Deep Tubewell	30	0	0	0	1	22.8092	89.1863
	374	Kumira	Senpur	Governmental	Shenpur Govt. Primary School	Deep Tubewell	150	0	0	1	1	22.8097	89.1876
	375	Kumira	Senpur	Kader Shekh	Shek para Kader's tubewell	Deep Tubewell	50	0	0	1	1	22.8108	89.1863
	376	Kumira	Senpur	Alom Sardar	Sardar para Alom's tubewell	Deep Tubewell	20	0	0	0	1	22.8123	89.1839
	377	Kumira	Senpur	Altaf Sardar	Sardar para Altaf's tubewell	Deep Tubewell	40	0	0	0	1	22.811	89.1837
	378	Kumira	Senpur	Akim Shekh	Shekh para Akim Shekh's tubewell	Deep Tubewell	30	0	0	1	1	22.8124	89.1827
	379	Kumira	Senpur	Haydar Ali Chowdhury	Shenpur eter vata	Shallow Tubewell	50	0	0	1	1	22.8092	89.1795
	380	Kumira	Senpur	Mosque Tubewell	Shek para Mosque's tubewell	Shallow Tubewell	30	1	0	1	1	22.8111	89.1873
	381	Kumira	Senpur	Shenpur mosque	Shekh para Shenpur mosque's tubewell	Shallow Tubewell	35	1	0	1	1	22.8	89.1667
	382	Magura	Balarampur	Government	balarampur govt. primary school's tube well	Deep Tubewell	200	0	0	0	1	22.7326	89.2079
	383	Magura	Balarampur	Government	government's tube well balarampur shah para	Deep Tubewell	20	0	1	0	1	22.7341	89.2014
	384	Magura	baliya doha	Bisho Kathi Govt.Primary School	East Para Govt. Primary School	Deep Tubewell	100	0	0	1	1	22.717	89.2167
	385	Magura	baliya doha	Balia Govt.Primary School	Baliya Govt.School's tubewell	Shallow Tubewell	350	1	0	1	1	22.7193	89.2061
	386	Magura	Barui Para	Sarkari tube well	Dash parar tube well	Deep Tubewell	200	0	0	0	1	22.7293	89.2406
	387	Magura	Bisukati	Government	bisukati side of moshjid's tube well	Deep Tubewell	30	1	1	1	1	22.7121	89.219
	388	Magura	bolorampur	Primary School Er Pase	bolorampur primary school's tubewell	Deep Tubewell	303	0	0	0	1	22.7425	89.2005
	389	Magura	bolorampur	Sarkari D.T.W	Moral Para Govt's tubewell	Deep Tubewell	50	0	1	0	1	22.7427	89.1991
	390	Magura	bolorampur	Anisur Rahman	Sardar Para Anisur's tubewell	Deep Tubewell	20	0	0	0	1	22.7416	89.2026
	391	Magura	bolorampur	Action Aid	Bolorampur Shekh Para Deep's tubewell	Deep Tubewell	20	0	1	1	1	22.7397	89.2056
	392	Magura	bolorampur	Alauddin Moral	Bolorampur West Para Mosque's tubewell	Shallow Tubewell	20	0	0	1	1	22.7447	89.1973
	393	Magura	bolorampur	Mosjid	Bolorampur Mali Para Mosque's tubewell	Shallow Tubewell	150	0	0	1	1	22.739	89.2071
	394	Magura	bolorampur	Mosjid	Bolorampur Mosque's tubewell	Shallow Tubewell	200	1	0	1	1	22.74	89.2056
	395	Magura	Chandkati	Phaleya Govt. Primary School	Phaleya Primary School's tubewell	Shallow Tubewell	127	1	0	1	1	22.7322	89.2199
	396	Magura	Chandkati	Phaleya Chandkati agrani High School	Phaleya Chandkati agrani High School's tubewell	Shallow Tubewell	450	1	0	1	1	22.7326	89.2192
	397	Magura	Chandkati	ruhul amin mollik	nikari para ruhul amin's tube well	Shallow Tubewell	30	0	0	0	1	22.7234	89.2174
	398	Magura	Chandkati	soleman nikari	nikari para soleman's tube well	Shallow Tubewell	24	0	0	1	1	22.7229	89.2149
	399	Magura	Chargram	Govt DTW	road side Govt. DTW	Deep Tubewell	50	0	0	0	1	22.7388	89.2534
	400	Magura	Chargram	Government	fokir para government (DTW)	Deep Tubewell	50	0	0	0	1	22.737	89.2501
	401	Magura	Chargram	Government (DTW)	shekh para government (DTW)	Deep Tubewell	30	0	0	0	1	22.7354	89.2511
	402	Magura	Chargram	Government	chargram side of main road government tube well	Deep Tubewell	20	0	1	0	1	22.7339	89.2585
	403	Magura	Chargram	Mosjid	Chargram Mosque's tubewell	Shallow Tubewell	50	0	0	0	1	22.7344	0
	404	Magura	Chorgram	ajit kha	south kha ajit kha's house	Shallow Tubewell	40	0	0	0	1	22.7353	89.2503
	405	Magura	Chragram	Mukul par	Purbo para mukul par's house	Deep Tubewell	30	0	0	1	1	22.7361	89.2545
	406	Magura	Chragram	Eid gah tube well	purbo para eid gah's tube well	Deep Tubewell	30	0	0	0	1	22.7366	89.2534
	407	Magura	Chragram	Masjid	Masjid's tube well	Shallow Tubewell	20	0	0	1	1	22.7363	89.2544
	408	Magura	Dhulanda	Dhulanda Govt. Primary School	North could Govt. Primary School	Shallow Tubewell	150	1	0	1	1	22.7268	89.2506
	409	Magura	Dhulanda	atiar gazi	dhulanda jame moshjid's tube well	Shallow Tubewell	25	0	0	1	1	22.7286	89.2544
	410	Magura	Falaya	falaya jame moshjid	side of it's seleing	Shallow Tubewell	20	0	0	1	1	22.7344	89.2152
	411	Magura	Foleya	Anarul shekh	Eid gah beside of	Deep Tubewell	20	0	0	0	1	22.7326	89.248
	412	Magura	Magura	Government tube well	bak para government tube well	Deep Tubewell	500	0	0	0	1	22.7241	89.2264
	413	Magura	Magura	dr. ajob ali	bak para ajob's tube well	Deep Tubewell	40	0	0	1	1	22.724	89.2232
	414	Magura	Magura	kobir morol	morol para side of road	Deep Tubewell	20	0	0	1	1	22.7281	89.2244
	415	Magura	magura	Malu Para Sarkari Tubewell	Malu Para Govt.'s tubewell	Deep Tubewell	100	0	1	0	1	22.726	89.2364
	416	Magura	magura	Magura Bazar Tubewell	Near Of Magura Market's tubewell	Deep Tubewell	200	0	0	1	1	22.7266	89.2333
	417	Magura	magura	Magura Bazar	Near Of Magura Market Gov's tubewell	Deep Tubewell	90	0	0	0	1	22.7263	89.2351
	418	Magura	magura	Pir Shaha Joynuddin	Near Of Pir Mosque's tubewell	Deep Tubewell	60	0	1	1	1	22.7256	89.2339
	419	Magura	magura	Mukti Fundetion	Beside Sekh Para Mukti Fundation's tubewell	Deep Tubewell	20	0	1	0	1	22.7246	89.2336
	420	Magura	Magura	Monoranjon Sarkar	Magura High School's tubewell	Shallow Tubewell	145	1	0	1	1	22.6951	89.2153
	421	Magura	Magura	Amol karmokar	41 No Govt. Primary School's tubewell	Shallow Tubewell	138	1	0	1	1	22.6951	89.2156
	422	Magura	Magura	progoti secondary school magura	progoti secondary school 's tube well	Shallow Tubewell	250	1	0	1	1	22.7213	89.2274
	423	Magura	Magura	magura shekh para jame moshjid	magura shekh para jame moshjid's tube well	Shallow Tubewell	100	0	0	1	1	22.7189	89.2279
	424	Magura	Magura	ideal women's collage	side of road	Shallow Tubewell	20	0	0	1	1	22.7272	89.2295
	425	Magura	magura	Alauddin	Near Of Magura Market P.S.J South Madrasa	Shallow Tubewell	100	0	0	1	1	22.7262	89.2338
	426	Magura	magura	Pir Shaha Joynuddin	Near Of Magura Market Pir's tubewell	Shallow Tubewell	50	0	0	1	1	22.7259	89.2337
	427	Magura	magura	Pir Shaha Joynuddin	Near Of Magura Market Pir's tubewell	Shallow Tubewell	50	0	0	1	1	22.7259	89.2337
	428	Magura	magura	Pir Shaha Joynuddin	Near Of Magura Market Pir Shah Joinuddin's tubewell	Shallow Tubewell	60	0	0	1	1	22.7257	89.2337
	429	Magura	magura	Mondir Tubewell	Near Of Magura Market Temple's tubewell	Shallow Tubewell	100	0	0	1	1	22.7262	89.2345
	430	Magura	Maguradanga	Kurani Madrasha	Maguradanga Kurani Madrasha	Deep Tubewell	50	0	0	1	1	22.7171	89.2267
	431	Magura	Maguradanga	Naran Mojumdar	Mondol Para Naranl's tubewell	Deep Tubewell	20	0	0	1	1	22.7099	89.2269
	432	Magura	Maguradanga	beside kalam kha's house	beside kalam kha's house maguradanga	Deep Tubewell	50	0	0	1	1	22.7194	89.2231
	433	Magura	Maguradanga	Sardar para Jame moshjid	Sardar para mosque's tubewell	Shallow Tubewell	30	0	0	1	1	22.7166	89.2247
	434	Magura	Maguradanga	md. kamrul islam	nath para M.D.S aideal dakhil madrasa	Shallow Tubewell	156	0	0	1	1	22.7199	89.2249
	435	Magura	Maguradanga	maguradanga jame moshjid	maguradanga jame moshjid	Shallow Tubewell	150	1	0	1	1	22.7211	89.2233
	436	Magura	Maguradanga	maguradanga bashonto mondir	bashonto mondir's tube well majher para maguradanga	Shallow Tubewell	50	1	0	0	1	22.7058	89.2264
	437	Magura	Mandra	Governmental Dip tubewell	Side of the temple deep tubewell	Deep Tubewell	30	0	0	0	1	22.6941	89.2064
	438	Magura	Mandra	nikhil chondro rai	nikhil chondro rai's tube well, mandra	Deep Tubewell	45	0	1	1	1	22.6937	89.2128
	439	Magura	Mandra	side of proshad sorkar	mandra side of proshad sorkar's house	PSF	250	0	0	0	1	22.6933	89.2105
	440	Magura	Mandra	High School	Mandra High School's tubewell	Shallow Tubewell	200	0	0	0	1	22.694	89.2058
	441	Magura	Mandra	School	Mandra Government schools tubewell	Shallow Tubewell	32	1	0	1	1	22.6938	89.2065
	442	Magura	Mandra	nironjon mondol	purbo para nironjon's tube well	Shallow Tubewell	20	1	0	1	1	22.6962	89.223
	443	Magura	Mandra	shonjoi mondol	mandra macher para shonjoi's tube well	Shallow Tubewell	50	1	0	1	1	22.6956	89.2159
	444	Nagarghat	Ashar Nagar	Mosque's tubewell	South Para Mosque's tubewell	Shallow Tubewell	20	1	0	1	1	22.7464	89.1308
	445	Nagarghat	ashar nogor	Sorkari	North Para Govt. Dip's tubewell	Deep Tubewell	30	0	0	1	1	22.7531	89.1276
	446	Nagarghat	ashar nogor	Primary School	South Para Govt. Primary School	Deep Tubewell	20	0	1	1	1	22.7482	89.1311
	447	Nagarghat	ashar nogor	Otul Sana	Middle Para Otulsana's tubewell	Shallow Tubewell	20	0	0	1	1	22.7493	89.1301
	448	Nagarghat	Baghkhali	rishilip	rishilip's tube well, baghkhali	Shallow Tubewell	30	1	0	1	1	22.7274	89.1094
	449	Nagarghat	Basun Dhara	Government tube well	Government tube front side of basun dhara jame moshjid	Deep Tubewell	80	0	0	1	1	22.7521	89.1083
	450	Nagarghat	Beradangi	shuvash biswas	beradangi front side of lilapod biswas's shop	Deep Tubewell	40	0	0	0	1	22.7315	89.1061
	451	Nagarghat	boro nogorghata	Sarkari Tubewell	West Side Of Porar Market	Deep Tubewell	80	0	0	1	1	22.785	89.1059
	452	Nagarghat	boro nogorghata	Md.Ataur Rahman	Coaching Center's tubewell Beside Porar Market	Shallow Tubewell	35	0	0	1	1	22.7813	89.1103
	453	Nagarghat	boro nogorghata	Bazar's tubewell	Porar Market's tubewell	Shallow Tubewell	100	0	0	1	1	22.7816	89.1158
	454	Nagarghat	boshundhora	Uttoron	Boshundhara Uttoron's tubewell	Deep Tubewell	20	1	0	1	1	22.7464	89.1297
	455	Nagarghat	Chokar Kanda	Deep's Tubewell	Sardar Para Deeptubewell	Shallow Tubewell	20	0	0	1	1	22.7904	89.0983
	456	Nagarghat	Chokar Kanda	Deep's Tubewell	South Para Deeptubewell	Shallow Tubewell	20	0	0	0	1	22.7873	89.0994
	457	Nagarghat	Dakshin Nagarghata	golam		Shallow Tubewell	100	1	0	1	1	22.7653	89.114
	458	Nagarghat	dokkhin nogorghata	Munsur Sardar	Nogorghata Sardar Para Munsur Sardar's house	Deep Tubewell	100	0	0	0	1	22.7695	89.1113
	459	Nagarghat	gab tola	Gabtola Mosque	Sordar Para Gabtola Mosque	Shallow Tubewell	30	0	0	1	1	22.7827	89.1042
	460	Nagarghat	Gabtali	subhan gazi		Shallow Tubewell	100	0	0	1	1	22.7856	89.1004
	461	Nagarghat	Gabtali	deep tube well		Shallow Tubewell	25	0	1	1	1	22.7836	89.1014
	462	Nagarghat	Gabtali	hamed ali		Shallow Tubewell	23	0	0	1	1	22.7814	89.1011
	463	Nagarghat	Gabtali	gofur sordar	sordar para gofure's tube well	Shallow Tubewell	30	0	0	0	1	22.7837	89.1015
	464	Nagarghat	Goalpota	gour pod mondol	gour pod mondol's house, goalpota	Deep Tubewell	20	0	0	0	1	22.7272	89.1247
	465	Nagarghat	Goalpota	Government tube well	Government tube well side of road dakshin para	Deep Tubewell	50	0	0	0	1	22.7231	89.1317
	466	Nagarghat	hajra tola	Abu Bokkor Ansari	Hajra Tola Abu Bokkor House	Shallow Tubewell	25	0	0	0	1	22.7754	89.1094
	467	Nagarghat	Harinkhola	kartik mondol	boro harinkhola kartik's tube well	Deep Tubewell	40	0	0	1	1	22.7351	89.1199
	468	Nagarghat	Harinkhola	Government	purbo para government deep tube well	Deep Tubewell	50	0	1	1	1	22.7368	89.1283
	469	Nagarghat	Harinkhola	Government deep tube well	government deep tube well uttar para	Shallow Tubewell	25	0	1	0	1	22.7387	89.1315
	470	Nagarghat	Harinkhola	reshinpi	uttar para reshilpi's water filter	Shallow Tubewell	50	0	0	0	1	22.7421	89.1332
	471	Nagarghat	Kapasdunga	Kapash Danga Primary School	West Side Of Kapasdanga Primary School	Deep Tubewell	20	0	0	1	1	22.7597	89.1179
	472	Nagarghat	khan para	Nogor Ghata Praimary School	Nogor Ghata Praimary School	Shallow Tubewell	40	0	0	1	1	22.7819	89.1088
	473	Nagarghat	Mathbari	mosque		Shallow Tubewell	123	1	0	1	1	22.769	89.1164
	474	Nagarghat	Mathbari	arijul sardar		Shallow Tubewell	23	1	0	1	1	22.7691	89.1176
	475	Nagarghat	mot bari	Sorkari	South Para Dip's tubewell	Deep Tubewell	50	0	1	1	1	22.7667	89.1162
	476	Nagarghat	Nagarghata	habibur rahman	shekh para	Deep Tubewell	50	0	0	1	1	22.7882	89.1052
	477	Nagarghat	Nagarghata	government tubewel		Deep Tubewell	60	0	0	1	1	22.765	89.1135
	478	Nagarghat	Nagarghata	insap sordar	insap's tube well sordar para	Deep Tubewell	20	0	0	0	1	22.7771	89.1127
	479	Nagarghat	Nagarghata	i.u.p tubewell	nagarghata union porishod	Shallow Tubewell	180	0	0	1	1	22.782	89.1091
	480	Nagarghat	Nagarghata	alomgir hosen sordar	alomgir's tube well rice mill	Shallow Tubewell	30	0	0	0	1	22.7806	89.1117
	481	Nagarghat	Nagarghata	moshjid's tube well	nagarghata rice mill square	Shallow Tubewell	30	1	0	1	1	22.7806	89.1114
	482	Nagarghat	Nagarghata	bazaar's tube well	bazaar's tube well	Shallow Tubewell	200	0	0	1	1	22.7803	89.1116
	483	Nagarghat	Nagarghata Rishipara	government tubewel		Deep Tubewell	100	0	0	0	1	22.7716	89.1164
	484	Nagarghat	Nagarghata Rishipara	dolit das		Deep Tubewell	100	0	1	0	1	22.7775	89.1191
	485	Nagarghat	Nagarghata Rishipara	bridge office		PSF	500	0	0	0	1	22.7726	0
	486	Nagarghat	Nagarghata Rishipara	ahad ali		Shallow Tubewell	20	0	0	1	1	22.7792	89.1172
	487	Nagarghat	Nagarghata Rishipara	rishilpi		Shallow Tubewell	50	0	0	1	1	22.7774	89.1192
	488	Nagarghat	NagarghataÃ¡Kalibari	yarul islam morol	morol para yarul's tube well	Deep Tubewell	30	0	0	1	1	22.7742	89.1134
	489	Nagarghat	nimtola	Khogen	Nimtola Khogen Er Land A Bosano	Deep Tubewell	100	0	0	0	1	22.7651	89.1084
	490	Nagarghat	nimtola	Deep Tubewell Nimtola	Nimtola North Para Deep's tubewell	Shallow Tubewell	20	0	1	0	1	22.7694	89.1082
	491	Nagarghat	nogorghata	sarkari tubewell	Chairman Er Old House Govrnment's tubewell	Deep Tubewell	40	0	0	1	1	22.7696	89.1127
	492	Nagarghat	voirob nogor	Sorkari	Beside Road Govt.'s tubwell	Deep Tubewell	50	0	0	0	1	22.7653	89.1318
	493	Sharulia	Achimtala	govt. tube well	achimtala square's west side	Deep Tubewell	50	0	0	1	1	22.7558	89.1775
	494	Sharulia	Achimtala	jame moshjid	tube well side of moshjid	Deep Tubewell	50	0	0	0	1	22.7576	89.1701
	495	Sharulia	Achimtala	moshjid	moshjid's tube well beside the road	Shallow Tubewell	50	0	0	1	1	22.7547	89.1763
	496	Sharulia	Amtalardangi	Government tube well	majher para	Deep Tubewell	50	0	0	1	1	22.7478	89.164
	497	Sharulia	Amtalardangi	hamid morol	front of moshjid	Shallow Tubewell	30	1	0	1	1	22.7472	89.1637
	498	Sharulia	Bara Bila	bara bila high school	high school's tube well	Deep Tubewell	60	0	0	0	1	22.7847	89.149
	499	Sharulia	Bara Bila	hafej ajgar ali	ajgar's tube well	Shallow Tubewell	20	1	0	0	1	22.784	89.1486
	500	Sharulia	Bara Kashipur	md. hekmot ali khan	west side of madrasah	Deep Tubewell	1000	0	0	0	1	22.8026	89.1696
	501	Sharulia	Bara Kashipur	seikh sirajuddin	khan para	Deep Tubewell	100	0	0	0	1	22.8022	89.1732
	502	Sharulia	Bara Kashipur	shekh musfukur rahim	moddho para	Deep Tubewell	50	0	0	1	1	22.8064	89.1699
	503	Sharulia	Bara Kashipur	engr.shekh mujibur m.p	moddho para	Deep Tubewell	100	0	0	1	1	22.8062	89.1698
	504	Sharulia	Bara Kashipur	mikail shakh	beside koruna mojumdar house	Deep Tubewell	20	0	0	0	1	22.7969	89.167
	505	Sharulia	Bara Kashipur	-	mojumdar para	Deep Tubewell	80	0	0	0	1	22.7961	89.1684
	506	Sharulia	Bara Kashipur	alamin gazi	karigor para	Shallow Tubewell	20	0	0	1	1	22.793	89.1394
	507	Sharulia	Bara Kashipur	shekh akbar	purbo para	Shallow Tubewell	200	0	0	0	1	22.8044	89.1739
	508	Sharulia	Bharsha	bharsha govt. primary school	front side of the govt. school	Deep Tubewell	50	0	0	0	1	22.7496	89.1779
	509	Sharulia	chamarkhali	rabiul islam	chamarkhali government primary school	Shallow Tubewell	30	1	0	1	1	22.7439	89.1623
	510	Sharulia	Chhota Kashipur	shakh abdur roshid	beside of babul bishwas house	Deep Tubewell	30	0	0	0	1	22.7969	89.1578
	511	Sharulia	Chhota Kashipur	shujit kumar ghosh	ghosh para	Shallow Tubewell	25	0	0	1	1	22.7961	89.1542
	512	Sharulia	Choto Kashipur	Front Side Of Temple	Beside Temple In Das Para	Deep Tubewell	270	0	0	0	1	22.79	89.1548
	513	Sharulia	Chowgachha	seikh komol	government tubewell	Deep Tubewell	100	0	0	0	1	22.7749	89.1562
	514	Sharulia	Dakshin Shakdoha	Sarkari Dip	Shakdoha Dokkinpara	Deep Tubewell	30	0	0	0	1	22.7595	89.1429
	515	Sharulia	Gorer Danga	bishnupod mondol	dakshin para side of mondir	Deep Tubewell	20	1	0	1	1	22.7368	89.1581
	516	Sharulia	Hogladanga	pushkor bachar	hogladanga mondir	Shallow Tubewell	50	0	0	1	1	22.747	89.1599
	517	Sharulia	jugi pukuria	government tubewell	besides of bodrul chairman house	Deep Tubewell	40	0	0	1	1	22.7579	89.1555
	518	Sharulia	Jugi Pukuria	shahadat membar	karigor para moshjid	Shallow Tubewell	30	1	0	1	1	22.7582	89.1544
	519	Sharulia	jugi pukuria	government tubewell	government tubewell	Shallow Tubewell	20	0	0	1	1	22.7583	89.1538
	520	Sharulia	Juskhola	juskhola govt. primary school	govt. primary school's tube well	Deep Tubewell	100	0	0	0	1	22.7516	89.1679
	521	Sharulia	Juskhola	juskhola govt. primary school	govt. primary school's tube well side of road	Deep Tubewell	100	0	0	0	1	22.7513	89.1681
	522	Sharulia	Juskhola	Government tube well	west side of community clinic	Deep Tubewell	50	0	1	1	1	22.7537	89.1682
	523	Sharulia	Juskhola	rejaul islam babu	brick field	Shallow Tubewell	20	0	0	1	1	22.7573	89.1749
	524	Sharulia	Juskhola	rejaul islam babu	brick field	Shallow Tubewell	40	0	0	1	1	22.7565	89.1757
	525	Sharulia	Khurda	moslem khan	government deep tube well, khan bari	Deep Tubewell	50	0	1	0	1	22.7879	89.1536
	526	Sharulia	Par Kumira	shotto mojumder	mojumdar's deep tube well side of the road	Deep Tubewell	56	0	1	1	1	22.7727	89.1621
	527	Sharulia	Par Kumira	moshjid comity	moshjid's tube well north side	Shallow Tubewell	50	0	0	1	1	22.7714	89.1643
	528	Sharulia	Par Kumira	moshjid comity	moshjid's tube well south side	Shallow Tubewell	50	0	0	1	1	22.7667	89.15
	529	Sharulia	Patkelghata	West para moshjid	pashchim para moshjid	Deep Tubewell	20	0	1	0	1	22.7699	89.1602
	530	Sharulia	Patkelghata	patkelghata high school	school's tubewell	Deep Tubewell	100	0	0	0	1	22.7649	89.1831
	531	Sharulia	Patkelghata	patkelghata	market's tubewell	Shallow Tubewell	100	0	0	1	1	22.7649	89.1672
	532	Sharulia	Puthikhali	samad seikh	seikh para	Deep Tubewell	20	0	0	0	1	22.7844	89.1654
	533	Sharulia	Puthikhali	ariful mollik	purbo para	Deep Tubewell	20	0	1	1	1	22.8	89.167
	534	Sharulia	Puthikhali	temple	deep tube well	Deep Tubewell	300	0	1	0	1	22.79	89.1548
	535	Sharulia	Puthikhali	govrnmnt	deep tubewel	Deep Tubewell	100	0	1	0	1	22.7866	89.1601
	536	Sharulia	Puthikhali	shorkar	deep tubewel	Deep Tubewell	300	0	0	1	1	22.7838	89.1592
	537	Sharulia	Puthikhali	goffar morol	west side of seikh para mosque	Shallow Tubewell	20	0	0	0	1	22.7846	89.1664
	538	Sharulia	Puthikhali	birindro nath	binindros tubewel	Shallow Tubewell	23	1	0	1	1	22.7753	89.165
	539	Sharulia	Puthikhali	proshanto ghosh	proshantos tubewel	Shallow Tubewell	23	1	0	1	1	22.7749	89.1636
	540	Sharulia	Rajendrapur	Mondirer Kol	Gosh Para	Shallow Tubewell	30	1	0	1	1	22.7552	89.1659
	541	Sharulia	Saidpur	govenment	government deep tube well, behind the kitchen	Deep Tubewell	30	0	1	0	1	22.7969	89.1326
	542	Sharulia	Sarulia	nobo kumar ghosh	beside of dulal's house	Deep Tubewell	20	0	0	0	1	22.7968	89.1373
	543	Sharulia	Sarulia	Hamidul Jaman Sujan	Monwara member	Shallow Tubewell	35	1	0	1	1	22.7936	89.1433
	544	Sharulia	Sarulia	Madrasa Mosque	Tubewell of madrasa mosque	Shallow Tubewell	30	0	0	1	1	22.7956	89.145
	545	Sharulia	Shakdoho	Shakdoho Primary School	School's tubewell beside school road	Deep Tubewell	30	0	0	1	1	22.7647	89.1433
	546	Sharulia	Shan Kdaha	govt. tube well	shan kdaha purbo para side of moshjid	Shallow Tubewell	25	0	0	1	1	22.7658	89.1467
	547	Sharulia	Shan Kdaha	Govt. primary school	north part of school	Deep Tubewell	150	0	1	0	1	22.7629	89.1526
	548	Sharulia	Shan Kdaha	Government	Government tube well side of road	Deep Tubewell	150	0	0	0	1	22.7671	89.1551
	549	Sharulia	Shan Kdaha	jabax morol	jabax's tube well south side of house	Shallow Tubewell	25	0	0	1	1	22.7663	89.1574
	550	Sharulia	Shan Kdaha	moshjid comity	jame moshjid's tube well, front of moshjid	Shallow Tubewell	50	0	0	1	1	22.765	89.1576
	551	Sharulia	Shan Kdaha	moshjid commety	moshjid's tube well back side of moshjid	Shallow Tubewell	200	0	0	0	1	22.767	89.1553
	552	Sharulia	Shan Kdaha	Mosque Committee	sardar para mosque tubewell,besides the road	Shallow Tubewell	50	0	0	1	1	22.7641	89.1534
	553	Sharulia	Shan Kdaha	al faruk adorsho akademi	school's tubewell,south side of school	Shallow Tubewell	50	0	0	1	1	22.7668	89.1601
	554	Sharulia	Shialdangi	md. anisur rahman	morol para	Deep Tubewell	40	0	0	1	1	22.744	89.166
	555	Sharulia	tailkupi	mosque tubewell	south para besides of mosque	Deep Tubewell	40	0	0	1	1	22.7493	89.1514
	556	Sharulia	tailkupi	government	government tubewell,mathpara	Deep Tubewell	100	0	0	0	1	22.7574	89.1589
	557	Sharulia	tailkupi	tailkupi government primary school	government tubewell,besides the road	Deep Tubewell	50	0	0	0	1	22.7548	89.1561
	558	Sharulia	tailkupi	changing lives foundation	in front of tailkupi risi para temple	Deep Tubewell	20	0	0	1	1	22.7595	89.1564
	559	Tala	Aladipur			Deep Tubewell	46		0		1	22.7992	89.2642
	560	Tala	Aladipur			Shallow Tubewell	39		0		1	22.8021	89.2619
	561	Tala	Ataray			Shallow Tubewell	23		0		1	22.7882	89.2671
	562	Tala	Ataray			Shallow Tubewell	28		0		1	22.7623	89.2776
	563	Tala	Ataray			Shallow Tubewell	38		0		1	22.7662	89.2688
	564	Tala	Ataray			Shallow Tubewell	110		0		1	22.7768	89.2711
	565	Tala	Baruihati			Shallow Tubewell	37		0		1	22.7587	89.2598
	566	Tala	Baruihati			Shallow Tubewell	34		0		1	22.7582	89.2687
	567	Tala	Bhayra			Shallow Tubewell	21		0		1	22.7739	89.2558
	568	Tala	Bhayra			Shallow Tubewell	23		0		1	22.7692	89.2546
	569	Tala	Jatpur			Shallow Tubewell	24		0		1	22.8008	89.2578
	570	Tala	Juala Nalta			Shallow Tubewell	72		0		1	22.7789	89.2776
	571	Tala	Juala Nalta			Shallow Tubewell	49		0		1	22.7789	89.2776
	572	Tala	Khanpur			Deep Tubewell	27		0		1	22.7721	89.2439
	573	Tala	Khanpur			Deep Tubewell	53		0		1	22.7704	89.2438
	574	Tala	Khanpur			Deep Tubewell	94		0		1	22.7693	89.2421
	575	Tala	Khanpur			Deep Tubewell	61		0		1	22.7703	89.2456
	576	Tala	Khanpur			Shallow Tubewell	42		0		1	22.7769	89.2459
	577	Tala	Khanpur			Deep Tubewell	26		0		1	22.7689	89.2428
	578	Tala	Kharerdanga			Deep Tubewell	30		0		1	22.7601	89.2386
	579	Tala	Kismat Ghona			Deep Tubewell	64		0		1	22.7702	89.2337
	580	Tala	Kismat Ghona			Shallow Tubewell	24		0		1	22.7731	89.2352
	581	Tala	Kismat Ghona			Deep Tubewell	28		0		1	22.7737	89.2364
	582	Tala	Murakali			Deep Tubewell	29		0		1	22.7765	89.2411
	583	Tala	Rahimabad			Deep Tubewell	44		0		1	22.7491	89.2578
	584	Tala	Rahimabad			Deep Tubewell	31		0		1	22.7458	89.2639
	585	Tala	Tala			Deep Tubewell	118		0		1	22.7491	89.2578
	586	Tala	Tala			Deep Tubewell	50		0		1	22.7429	89.2576
	587	Tala	Tala			Deep Tubewell	39		0		1	22.7472	89.2573
	588	Tala	Tala			Deep Tubewell	123		0		1	22.7457	89.2566
	589	Tentulia	Arong para	Jakir Gazi	In west para	Deep Tubewell	150	0	0	0	1	22.8081	89.2104
	590	Tentulia	Dewani Para	Abul Kalam Sheikh	Kalam's deep tubewell beside dakhil madrasa	Deep Tubewell	50	0	0	0	1	22.7766	89.2343
	591	Tentulia	Dholbaria	Iusuf	In Sheikh para	Deep Tubewell	20	0	0	1	1	22.7922	89.2145
	592	Tentulia	Dholbaria	Robiul Sheikh	In Sheikh para	Shallow Tubewell	25	0	0	1	1	22.7922	89.2138
	593	Tentulia	Dholbaria	Govt. (Sobur Dofadar)	In dofadar para	Shallow Tubewell	25	0	0	1	1	22.791	89.2149
	594	Tentulia	Dholbaria	Muslim Aid Tubewell	In dholbaria	Deep Tubewell	20	0	0	0	1	22.7944	89.2164
	595	Tentulia	Dholbaria	Beside House Of Julfikar	In dholbaria	Deep Tubewell	20	0	0	0	1	22.7936	89.2001
	596	Tentulia	Dholbaria	Pal Para Puja Mandav	In dholbaria	Deep Tubewell	50	0	0	0	1	22.8022	89.2332
	597	Tentulia	Dholbaria	Beside House Of Jurmat	beside house of jurmat	Deep Tubewell	30	0	0	0	1	22.7956	89.2147
	598	Tentulia	Dholbaria	South Para Mosque	South para mosque's tubewell	Shallow Tubewell	60	0	0	1	1	22.7912	89.2159
	599	Tentulia	Dholbaria	Mosque	In dholbaria	Shallow Tubewell	70	1	0	1	1	22.7947	89.2176
	600	Tentulia	Haatbas	Ful Mia Sarder	In morol para	Deep Tubewell	40	0	0	0	1	22.8086	89.2301
	601	Tentulia	Haatbas	Mosque	In sarder para	Deep Tubewell	20	0	0	0	1	22.8063	89.2305
	602	Tentulia	Haatbas	Samsuddin Mor	In west para	Deep Tubewell	100	0	0	0	1	22.8077	89.2288
	603	Tentulia	Haatbas	Md. Abdul Rahim	In sarder para	Deep Tubewell	120	0	0	0	1	22.8049	89.2344
	604	Tentulia	Haatbas	Md. Shoriful Islam	In north para	Deep Tubewell	30	0	0	0	1	22.81	89.2302
	605	Tentulia	Haatbas	Bikash Sarker	Bikash's tubewell in rishi para of haatbas	Deep Tubewell	20	0	0	0	1	22.8032	89.2334
	606	Tentulia	Haatbas	Bansa Das	Bansa's house in north das para	Deep Tubewell	30	0	0	0	1	22.8032	89.2313
	607	Tentulia	Haatbas	Shonste Das	Shonste's house in north das para	Deep Tubewell	20	0	0	0	1	22.8031	89.2311
	608	Tentulia	Haatbas	Mission	Mission's tubewell of lakkhonpur	Deep Tubewell	30	0	0	0	1	22.7971	89.2277
	609	Tentulia	Haatbas	Govt.	In haatbas	Shallow Tubewell	200	1	0	1	1	22.8064	89.2288
	610	Tentulia	Kolia	Nurul Amin Morol	Nurul's tubewell in morol para	Deep Tubewell	350	0	0	0	1	22.7872	89.2358
	611	Tentulia	Lakkhonpur	Manik Sarker	Manik's tubewell in lakkhonpur	Deep Tubewell	20	0	0	0	1	22.8037	89.2364
	612	Tentulia	Lakkhonpur	Nurujjaman Morol	Nurujjaman's tubewell in morol para	Deep Tubewell	20	0	0	0	1	22.8009	89.2383
	613	Tentulia	Lakkhonpur	Ajij Maolana	Lakkhonpur bazar's tubewell	Shallow Tubewell	20	0	0	1	1	22.8045	89.2028
	614	Tentulia	Lakkhonpur	Samsur Rahman	Modapur govt. primary school's tubewell	Shallow Tubewell	200	0	0	1	1	22.8038	89.2357
	615	Tentulia	Lautara	Jalil Morol	In morol para	Deep Tubewell	50	0	0	0	1	22.8217	89.2226
	616	Tentulia	Naopara	Naopara Bazar'S Tubewell	Naopara bazar's tubewell	Shallow Tubewell	50	0	0	1	1	22.7924	89.2222
	617	Tentulia	Naopara	Bazar Committee	Naopara bazar's tubewell	Shallow Tubewell	40	1	0	0	1	22.7922	89.2221
	618	Tentulia	Naopara	Sattar Morol	Naopara bazar's tubewell	Shallow Tubewell	100	1	0	0	1	22.7923	89.2218
	619	Tentulia	Naoyabpara	Architecture Adipta'S Deep	Beside mijanur's house in naoyabpur	Deep Tubewell	50	0	0	0	1	22.7896	89.2277
	620	Tentulia	Naoyabpara	Uttar'S Tubewell	Beside ajim's house	Deep Tubewell	50	0	0	0	1	22.7912	89.224
	621	Tentulia	Naoyabpara	Naoyabpur Mosque	Mosque's tubewell on naoyabpara	Shallow Tubewell	100	0	0	1	1	22.7914	89.225
	622	Tentulia	Naoyapara	75 No Primary School	75 no. primary school's tubewell	Deep Tubewell	150	0	0	0	1	22.7908	89.2218
	623	Tentulia	Naoyapara	75 No Primary School	75 no primary school's tubewell	Shallow Tubewell	130	0	0	1	1	22.7912	89.2219
	624	Tentulia	Pachromi	Milia Sarker	Mission's tubewell	Shallow Tubewell	25	1	0	1	1	22.7977	89.2468
	625	Tentulia	Pachromi	Karim Morol	Karim's tubewell	Shallow Tubewell	150	0	0	0	1	22.8001	89.2485
	626	Tentulia	Shirashuni	West Para Primary School	west para primary school	Shallow Tubewell	150	0	0	1	1	22.8238	89.239
	627	Tentulia	Shirashuni	Sheikh Para Mosque	In Sheikh para	Shallow Tubewell	100	0	0	1	1	22.8293	89.2471
	628	Tentulia	Shirashuni	Shishurani Madrasa	Beside setu bazar	Shallow Tubewell	200	1	0	1	1	22.8254	89.2473
	629	Tentulia	Shirashuni	Rijarul Sheikh	In Sheikh para	Shallow Tubewell	20	0	0	1	1	22.8299	89.2463
	630	Tentulia	Shirashuni	Setu Bazar Mosque	Setu bazar mosque	Shallow Tubewell	200	0	0	1	1	22.8243	89.247
	631	Tentulia	Shirashuni	Mosque Of Morol Para	Mosque tubewell of morol para	Shallow Tubewell	30	0	0	1	1	22.8294	89.2509
	632	Tentulia	Shirashuni	Mosque Of Morol Para	Mosque in morol para	Shallow Tubewell	50	1	0	1	1	22.8303	89.2527
	633	Tentulia	Shuvashani	Shuvashani Govt Primary School	West side of bazar	Deep Tubewell	20	0	0	1	1	22.8123	89.2448
	634	Tentulia	Shuvashani	Shuvashani Degree Madrasa	West side of bazar	Shallow Tubewell	40	0	0	1	1	22.8128	89.2451
	635	Tentulia	Shuvashani	Shuvashani Govt Primary School	West side of bazar	Shallow Tubewell	20	1	0	1	1	22.8126	89.245
	636	Tentulia	Shuvashani	Shuvashani High School	West side of bazar	Shallow Tubewell	20	0	0	1	1	22.8122	89.2441
	637	Tentulia	Shuvashini	Mosque Of Kazi Para	Mosque's tubewell of kazi para	Shallow Tubewell	40	1	0	0	1	22.814	89.2343
	638	Tentulia	Shuvashini	West Para Mosque Shuvashini	Mosque's tubewell in sarder para	Shallow Tubewell	80	1	0	0	1	22.8174	89.2356
	639	Tentulia	Shuvashini	Mosque Of Sarder Para	Mosque of sarder para	Shallow Tubewell	50	1	0	0	1	22.8177	89.2326
	640	Tentulia	Sumujdipur	Abdul Hai	Abdul's tubewell	Deep Tubewell	100	0	0	0	1	22.7946	89.2432
	641	Tentulia	Sumujdipur	Jomir Sarder/ Alauddin Sarder	Jomir's tubewell	Shallow Tubewell	150	0	0	0	1	22.7973	89.2434
	642	Tentulia	Tersi	Bijoy Bihari Das	In katipara	Deep Tubewell	20	0	0	0	1	22.801	89.204
	643	Tentulia	Tersi	Govt. Deep	In tersi	Deep Tubewell	100	0	0	0	1	22.8072	89.2151
	644	Tentulia	Tersi	Jillur Morol	In morol para	Deep Tubewell	40	0	0	0	1	22.8057	89.2184
	645	Tentulia	Tersi	Bazar	In tersi	Shallow Tubewell	400	1	0	1	1	22.8061	89.2132
	646	Tentulia	Tersi	Community Clinic	In tersi	Shallow Tubewell	650	0	0	0	1	22.8014	89.2107
	647	Tentulia	Tersi	Bazar	In tersi	Shallow Tubewell	450	1	0	1	1	22.8071	89.2142
	648	Tentulia	Tersi	Tersi Mosque	In kazi para	Shallow Tubewell	20	0	0	1	1	22.8066	89.2155
	649				lavlus tubewell	Shallow Tubewell	20	1	0	1	1	22.7545	89.2825
	* Note: Analyzed result of Arsenic, Iron and Salinity are not presented on the data sheet. Here, 1=Presence of these elements and 0=These elements are not present
