# Supplementary material
Source: Frontiers journal article supplement (https://www.frontiersin.org/articles/371772)
Supplement: Data_Sheet_2.xlsx [file Data_Sheet_2.xlsx]

## Sheet: Table 2_260HH(PoU)_Survey&WQT
	Table 2. Coresponding 260 HH for survey and test of bacterial contamination
	qno	sslno	latitude	longitude	village	respondent name	source location	q1_9	union	q1_5	q1_6	q1_10	hh member	q2_2	q2_3	q2_4	q2_5	q2_6	q2_7	q2_8	q2_9	hh condition	q3_1	q3_21	q3_22	q3_23	q3_3	q3_41	q3_42	q3_43	q3_44	q3_51	q3_52	q3_6	willingness to pay	q3_8	q4_1sd	q4_1st	q4_1tr	q4_2sd	q4_2st	q4_2tr	q4_3sd	q4_3st	q4_3tr	q4_4sd	q4_4st	q4_4tr	q4_4re
	2	42	22.7901	89.1078	ALIPUR	SOBURA BEGUM	ALIPUR KHAN PARA	ALIPUR KHAN PARA	Dhandia	SOBED ALI KHAN	1700000000	JOHOR ALI KHAN	3	23	30		1	15000	1000	4000	40000	3	7	2			2	2				1		1	1	2
	7	826	22.8118	89.1299	DHANDIA	ANITA DAS	DHANDIA DAS PARA	DHANDIA DAS PARA	Dhandia	ASHUTOSH DAS	1800000000	ASHUTOSH DAS	4	28	13	14	1	9000	1000	8000	90000	3	13	7			2	2				5		1	1	2
	8	827	22.8112	89.1295	DHANDIA	SANDHA RANI DAS	DHANDIA DAS PARA STW	DHANDIA DAS PARA	Dhandia	KALIPADA DAS	1700000000	KALIPADA DAS	15	15			1	7000	500	7000	80000	2	14	7			2	2				5		1	3	1
	11	989	22.8272	89.1111	GARER DANGA	MST. BEAUTI KHATUN	GARER DANGA BISWAS PARA	GARER DANGA BISWAS PARA	Dhandia	SOBUR BISWAS	1700000000	MD. SHOFIQUL BISWAS	5	13			1	30000	2000	7000	80000	3	14	7			2	2				5		1	1	2
	12	1029	22.827	89.1053	GARER DANGA	BABU MOLLA	GARER DANGA MOLLA PARA	GARER DANGA MOLLA PARA	Dhandia	MOSLEM MOLLA	1800000000	MOSLEM MOLLA	5	1			1	7000	700	3500	40000	3	14	7			2	1				5		1	1	2
	15	1284	22.8232	89.1317	KATAKHALI	MD. A. SABUR SARDAR	KATAKHALI BAZARER SIDE	KATAKHALI BAZARER PASHE	Dhandia	MD. A. SABUR SARDAR	1800000000	MD. A. SABUR SARDAR	4	13	14	7	1	12000	900	4000	42000	3	13	2			2	2				5		1	1	2
	16	1311	22.8243	89.1329	KATAKHALI	CHINA RANI SAHA	KATAKHALI SAHA PARA	KATAKHALI SAHA PARA	Dhandia	ASHOK SAHA	1800000000	ASHOK SAHA	4	13			1	5000	500	4000	48000	3	12	7			2	5				5		1	1	2
	18	1475	22.8237	89.1411	KRISHNA NAGAR	MD. HABIULLAH	KRISHNA NAGAR GAZI PARA	KRISHNA NAGAR GAZI PARA	Dhandia	KRISHNA NAGAR GAZI PARA MASJID STW	1700000000	MD. SHAMSUR RAHMAN GAZI	5	29	8		1	7000	800	5000	55000	3	13	7			2	2				4		1	1	2
	19	1500	22.8258	89.1386	KRISHNA NAGAR	RANAJIT BISWAS	KRISHNA NAGAR MALU PARA	KRISHNA NAGAR MALU PARA	Dhandia	KRISHNA NAGAR MALU PARA	2000000000	AMOL BISWAS	5	34			1	7000	700	8000	90000	3	17	7			2	2				5		1	1	2
	23	1944	22.8199	89.1143	MANIK HAR	ABU SAIF SHEIKH	MANIK HAR MAJHER PARA MASJID	MANIK HAR MAJHER PARA MASJID	Dhandia	MANIK HAR MAJHER PARA MASJID	1800000000	ABU SAIF SHEIKH	8				2	5000	500	6000	78000	3	20	2			2	2				5		1	1	2
	29	2191	22.7941	89.1175	PANCHPARA	MONOWARA BEGUM	PANCH PARA SCHOOLER PASHE	PANCH PARA SCHOOLER PASHE	Dhandia	PANCH PARA GOVT.PRIMARY SCHOOL		ANISUR RAHMAN	5	13	30		1	27000	3000	8000	90000	2	12	2			2	2	4	5		7		1	1	2
	30	2363	22.7956	89.1152	PANCHPARA	BAZLUR RAHMAN	PANCH PARA GAZI PARA	PANCH PARA GAZI PARA	Dhandia	IMAN ALI GAZI	1800000000	IMAN ALI GAZI	8	30	14	13	1	20000	1500	20000	220000	2	30	2			2	2				7		1	2	2
	35	3231	22.8013	89.1228	SENER GATI	AKBOR ALI SHEIKH	SENER GATI SHEIKH PARA	SENER GATI SHEIKH PARA	Dhandia	AKBOR ALI SHEIKH	1800000000	AKBOR ALI SHEIKH	4	13	15	28	1	12000	1000	6000	70000	2	12	8			2	2				5		1	1	2
	36	3243	22.8019	89.1236	SENER GATI	ABDUL SALAM SHEIKH	SENER GATI SHEIKH PARA	SENER GATI SHEIKH PARA	Dhandia	MD. DHIRAJTULLAH SHEIKH	1800000000	MD. DHIRAJTULLAH SHEIKH	5				2	1000	200	5000	50000	3	13	7			2	2				5		1	1	2
	40	3555	22.8038	89.1169	SENER GATI	BDUL HAMID SARDAR	SENER GATI SARDAR PARA	SENER GATI SARDAR PARA	Dhandia	MD. MANIK SARDAR	1800000000	ABDUL HAMID SARDAR	3				1	1000	200	5000	50000	3	6	2			2	2				5		1	1	2
	41	3564	22.8045	89.1167	SENER GATI	ARSHAD ALI MOROL	SENER GATI MOROL PARA	SENER GATI MOROL PARA	Dhandia	BABOR ALI MOROL	1700000000	BABOR ALI MOROL	5	14			2	1000	100	4500	45000	3	15	2			2	2				5		1	1	2
	42	3573	22.8058	89.1142	SENER GATI	MD. MOSLEM ALI MOROL	SENER GATI MOROL PARA	SENER GATI MOROL PARA	Dhandia	MD. MOSLEM ALI MOROL	1800000000	MD. MOSLEM ALI MOROL	2				1	1000	100	4000	40000	3	4	2			2	5				5		1	1	2
	43	3640	22.8134	89.1189	SENER GATI	MD. YAKUB ALI	SNSER GATI BAZAR JAME MASJID	SNSER GATI BAZAR JAME MASJID	Dhandia	SNSER GATI BAZAR JAME MASJID	1700000000	MD. YAKUB ALI	4	28	14		1	15000	1500	7000	80000	2	12	2			2	2				5		1	1	2
	45	3741	22.7686	89.2139	BARAT	SAFIRON BEGUM	PURBO PARA JAME MASJID ER DTW	PURBO PARA JAME MASJID ER PASHE	Islamkati	MD. HAFIZUR RAHMAN GAZI	1800000000	MD. HAFIZUR RAHMAN	4	23	28		1	20000	4000	13000	150000	3	18	8			1	1	2			5		2
	47	3743	22.7707	89.2135	BARAT	MUSLIMA BEGUM	ASADUL MOROL ER DOKAN	PRIMARY SCHOOL SAMNE DOKAN	Islamkati	ASADUL MOROL	1800000000	ASADUL MOROL	4	13			2	9000	500	12000	144000	3	17	5	6		2	6				1	8	1	1	2
	48	3746	22.7692	89.2049	BARAT DAS PARA	LAXMI RANI DAS	DULAL CHANDRA DAS ER DTW	DULAL CHANDRA DAS ER BARI	Islamkati	DULAL CHANDRA DAS	1700000000	DULAL CHANDRA DAS	3	12	23		1	70000	8000	25000	300000	1	13	8			1	1	2			5		1	3	1
	52	3918	22.7706	89.215	BARAT	SHAKILA BEGUM	AJIT GAZIR STW	BARAT GOVT. PRIMARY SCHOOL PASHE	Islamkati	AJIT GAZI	1800000000	AFZAL GAZI	3	15			1	2000	400	8000	9000	2	12	2	3		3	5				1		2
	53	3960	22.7721	89.201	BARAT (RISHI PARA)	HALIMA BEGUM	RISHI PARA ABDUL SALAM ER STW	RISHI PARA ABDUL SALAM ER STW	Islamkati	MD. ABDUL SALAM MOROL	2000000000	MD. ABDUL SALAM MOROL	4	13			2	25000	1500	12000	144000	3	15	8			2	1	2			5		1	2	2
	54	4051	22.7695	89.2023	BARAT	MD. SHAMSUR RAHMAN	KARIGAR PARA JAME MASJID PASHE	KARIGAR PARA MASJIDER PASHER BARI	Islamkati	MONTAZ SARDAR	1800000000	SHAMSUR RAHMAN	4	14			1	6000	400	5000	55000	3	16	1	2	3	4	5				1		2
	64	4467	22.7581	89.2333	GHONA	AZIM MOROL	GHONA BAZARER PASHE	GHONA BAZARER PASHE	Islamkati	GOVERNMENT	1900000000	AZIM MOROL	5	13			1	500	50	6000	72000	3	20	8			1	2	4	5		5		1	1	1
	66	4469	22.7621	89.2288	GHONA	JOSNA BEGUM	GHONA SARDAR PARA	SARDAR PARA	Islamkati	GOVT./DOLIT	1900000000	SAWKAT SARDAR	4	13	28		1	2500	500	4000	50000	3	12	8			2	2				5		2
	70	4474	22.7623	89.2305	GHONA	MD. ASHRAFUL ISLAM	GHONA KARIGAR PARA	KARIGAR PARA	Islamkati	GOVERNMENT	1700000000	MD. ASHRAFUL ISLAM	6	14	15	13	1	1400	120	7200	90000	2	25	8			1	2				5		1	1	1
	71	4540	22.7584	89.2331	GHONA	MST. TANJILA BEGUM	GHONA PALLIMONGAL SECON.SCHOOL	GHONA PALLIMONGAL SCHOOLER PASHE	Islamkati	GOVERNMENT	1900000000	MD. MOFIJUL MOROL	5	14			2	500	50	5000	80000	3	20	2			3	2				1		2
	74	4701	22.7718	89.2314	GHONA	BITHIKA MONDAL	UTTAR GHONA RAJBONGSHI PARA	UTTAR GHONA RAJBONGSHI PARA	Islamkati	SADHU MONDAL	1700000000	SADHU MONDAL	4	14			1	2000	200	5500	70000	2	12	5			3	5				1		1	1	1
	75	4878	22.7387	89.2341	UTHALI	MST. ROHIMA BEGUM	UTHALI NATUN BAZARER PASHE	UTHALI NATUN BAZAR	Islamkati	MD. ATIAR MOROL	1800000000	MD. ATIAR MOROL	3	2			1	600	10000	1000	120000	2	10	8			4	5				5		2
	91	5239	22.7463	89.2643	ISLAMKATHI	TAHMINA	ISLAMKATHI BAZAR MASJID STW	ISLAMKATHI PM SCHOOLER UTTAR PASHE	Islamkati	MASJID	1700000000	SALAM SANA	4				1	4000	800	600	8000	3	18	8			2	1	2			5		2
	92	5274	22.7474	89.1976	ISLAMKATHI	MORIUM BEGUM	ISLAMKATHI D.PARA MOZIBOR TUBEWELL	MASJIDER UTTAR PASHE MATHER PASE BARI	Islamkati	MOZIBOR	1800000000	MD. SAIDUL SHEIKH	5				1	2000	400	7000	80000	3	18	8			3	1	2	5		3		2
	94	5428	22.7609	89.1977	ISLAMKATHI	ABDUL GAFUR	MOROL PARA	MOROL PARA	Islamkati	AYUB HOSSAIN	1700000000	ABDUL GAFUR	4				1	5400	450	8000	96000	2	4	5			2	5				1		1	1	4
	97	5574	22.7613	89.2006	ISLAMKATHI (SARDAR PARA)	MOJAFFOR HOSSAIN	ABDUL RAZZAK ER BARI STW	SARDAR PARA ABDUL RAZZAK ER BARI	Islamkati	ABDUL RAZZAK SARDAR	1700000000	ABDUL RAZZAK SARDAR	5	1			1	50000	3000	8000	100000	3	25	1	2	4	3	6				1		1	2	2
	99	5703	22.7569	89.1992	ISLAMKATHI	MONIRUZZAMAN	EIDGAON PASHE L.MOHIDULER BARI	EIDGAON ER PASHER BARI	Islamkati	HABIBUR SHEIKH	1800000000	ABDUL KARIM	4	13			1	6000	700	5000	70000	3	13	1	2	3	4	5				1		2
	100	5705	22.7523	89.1984	ISLAMKATHI	GITA	SWAPAN DOCTORER BARI	SWAPAN DOCTORER OWN STW	Islamkati	D. SWAPAN PATNI	1700000000	ASHOK BENARJYEE	3				1	3000	1000	15000	190000	2	12	8			3	1	2	4	5	5		1	1	3
	101	5793	22.7492	89.1989	ISLAMKATHI	SALMA BEGUM	MOROL PARA LIAKAT ER TUBEWELL	ISLAMKATHI DAKHIN PARA SHORIFULER BRI	Islamkati	LIAKAT MOROL	1700000000	SHORIFUL MOROL	4				1	13000	700	5000	80000	3	20	8			2	1	2	5		5		1	1	3	2015-08-17	14	28.9	2015-08-17	14	1218	2015-08-17	14.1	2	2015-08-17	14.15	50-100	CLOSE TO 100
	102	5879	22.7663	89.2219	KAZI DANGA	MOMOTAZ BEGUM	GAZI PARA	GAZI PARA	Islamkati	MAHABUR GAZI	1700000000	MAHABUR GAZI	5				2	10000	800	3000	35000	3	30	8			2	5				3		1	1	3
	104	5929	22.7383	89.2326	NANGLA	REHANA PARVIN	NANGLA PRIMARY SCHOOLER DTW	NANGLA PRIMARY SCHOOLER PASCHIM PASHE	Islamkati	NANGLA PRIMARY SCHOOLER DTW	1700000000	MASTER AZIZUR RAHMAN	4				2	50000	3000	11000	132000	2	15	3			3	5				1	3	1	1	1
	105	5931	22.7414	89.2237	NANGLA	SAKIR HOSSAIN	NANGLA DOTALA BARIR PSF	NANGLA DOTALA BARI SAKIR RAHMAN	Islamkati	JAKIUR RAHMAN MOROL	1700000000	SAKIR HOSSAIN	5	1			1	10000	2000	10000	120000	2	15	8			2	1	2	4		8		1	2	2
	108	6152	22.7393	89.2361	UTHALI	MD. ABDUL BARIK EHAN	UTHALI KHAN PARA MASJIDER PASE	UTHALI KHAN PARA MASJIDER PASE	Islamkati	ABDUL MAJID KHAN	1700000000	MD. ABDUL BARIK KHAN	4	13	14		2	3000	500	5000	60000	2	15	3			4	1	2	4	5	5		1	1	1
	117	6350	22.7526	89.2229	SUJON SHAH	MASURA BEGUM	ASHADUL MEMBERER DTW	ASHADUL MEMBERER BARI	Islamkati	ASHADUL MEMBER	1800000000	IBRAHIM SARDAR	4	13	28		1	5000	500	20000	250000	2	16	8			2	1	2			5		1	1	4
	118	6522	22.7526	89.2247	SUJON SHAH	SALEHA BEGUM	SARDAR PARA ANSAR ALI STW	SARDAR PARA ANSAR ALIR BARI	Islamkati	ANSAR ALI SARDAR	2000000000	ANSAR ALI SARDAR	2	29	28		2	8000	1000	3000	40000	3	8	2			3	6				1	3	1	1	1
	119	6552	22.75	89.2196	SUJON SHAH	SHYAMOLI DAS	SUJON SHAH BAUKHOLA PR. SCHOOL	SUJON SHAH BAUKHOLA P.SCHOOLER PASE	Islamkati	PRIMARY SCHOOLER STW	1900000000	NEMAI DAS	3	29	14	15	1	2000	200	6000	70000	3	8	2	5		3	6				1		1	1	1
	120	6580	22.7462	89.2232	SUJON SHAH	SHORIFUL	SUJON SHAH BAZARER STW	RIA MISTANNYA BHANDER	Islamkati	SUJON SHAH BAZARER STW	1700000000	BISWAJIT DATTA	6	29	31		1	5000	500	10000	120000	3	20	2	4		3	6				1		1	1	1
	123	6708	22.7435	89.2384	UTHALI	SHEIKH AMINUR	UTHALI GOVT. PRIMARY SCHOOL	SCHOOLER PASHE	Islamkati	GOVT. PRIMARY SCHOOL	2000000000	SHEIKH AMINUR	5	7			1	2000	200	4000	50000	2	20	2			4	2	5			5		1	1	3
	126	6782	22.7508	89.2451	GOPALPUR	CHANDI DAS	GOPALPUR GOVT. PRIMARY SCHOOL	GOPALPUR GOVT. PRIMARY SCHOOL	Islamkati	GOPALPUR GOVT. PRIMARY SCHOOL	1700000000	CHANDI DAS	4	22			1	25000	2000	15000	180000	2	18	8			2	5				5		1	1	1
	129	6902	22.7409	89.2369	UTHALI	MD. ROFIQUL ISLAM	UTHALI SARDAR PADA	UTHALI SARDAR PARA	Islamkati	MOHAMMAD ALI SARDAR	1900000000	MD. MOJAM SARDAR	6	23	14	13	1	15000	1500	5000	60000	3	25	8			2	1	2	5		5		1	3	2
	132	7069	22.6976	89.2395	ATHALIA	MOROL OSMAN ALI	ATHALIA GOVT. PRIMARY SCHOOL	ATHALIA SCHOOLER DAKHIN PASER BARI	Jalalpur	ATHALIA GOVT. PRIMARY SCHOOL	1700000000	MOROL OSLAM ALI	5				1	10000	1000	20000	230000	2	22	3			2	1	2			9		1	1	1
	136	7444	22.6848	89.2465	DOHAR	HASINA BEGUM	DOHAR PURBO GOVT. DTW	DOHAR PURBO PARA MASJIDER PASHE	Jalalpur	GOVT. DTW	1800000000	ABDUL JALIL SARDAR	4	29			1	8000	600	8000	120000	2	18	2	3		3	5				1	9	2
	137	7448	22.6977	89.2344	DOHAR	AKTARUL SARDAR	DOHAR MOFIJ MASTERER PSF	DOHAR MOFIJ MASTERER BARI	Jalalpur	NAZRUL KARI	1800000000	AKTARUL ISLAM SARDAR	5				1	8000	600	5000	80000	3	23	8			1	1	2	4		5		1	1	1
	141	8233	22.7034	89.2528	JALALPUR	SAFIA BEGUM	JALALPUR DAKHIN PARA JAME MASZID	DAKHIN PARA JAME MASJIDER PASHE BARI	Jalalpur	DAKHIN PARA JAME MASJID	1800000000	HABEBULLAH MIAH	4	29			1	6000	400	4000	60000	3	15	3			3	5				9		2
	145	8498	22.7243	89.2642	JETHUA	SHEFALI BEGUM	UTTAR SHEIKH PARA DTW	UTTAR SHEIKH PARA SHAHIDULER BARIR PASE	Jalalpur	GOVT. DTW	1700000000	SHEIKH KAMAL HOSSAIN	4	12			1	10000	1200	9000	110000	3	20	8			1	2	5	1		5		2
	146	8499	22.7118	89.2737	JETHUA	SATHI BEGUM	SAWKAT MASTERER BARI PASHE	FAKIR PARA SAWKAT MASTERER BARI PASE	Jalalpur	GOVT. DTW	1700000000	KAMRUL ISLAM	4	14			1	7000	300	6000	70000	2	18	2	3		2	5	4			1	9	2
	154	9357	22.6926	89.3034	KANAIDIA	JESMIN	KANAIDIA PURBO PARA DTW	PURBO PARA ABDUL JALILER BARI PASHE	Jalalpur	PURBO PARA GOVT. DTW	1700000000	ASADUL SARDAR	4	14			1	7000	700	5000	70000	3	14	8			2	1	2	5		5		2
	163	10256	22.716	89.2717	JETHUA	SWAPNA BEGUM	SARDAR PARA MASJID STW	MASJIDER PASHER BARI SARDAR PARA	Jalalpur	SARDAR PARA MASJID	2000000000	KHALILUR RAHMAN	4				1	7000	800	6000	80000	2	16	2	3		2	2				1	9	2
	170	11200	22.7167	89.298	GANGARAMPUR (BISWAS PARA)	PARUL BEGUM	BISWAS PARA NABAB BISWASER STW	BISWAS PARA NABAB BISWAS ER BARI	Khalilnagar	NABAB BISWAS	1800000000	MD. NABAB BISWAS	3	14	23	29	2	10000	900	10000	120000	3	14	8			1	1	2	5		5		2
	174	11261	22.7368	89.2841	UTTAR NALTA (SARDAR PARA)	BAZLU BISWAS	KHOKON SARDARER DTW	KHOKON SARDAR ER BARIR PASHE	Khalilnagar	KHOKON SARDAR	1900000000	BAZLU SARDAR	3	15	13	14	1	5000	800	6500	80000	3	10	2	4		2	1	5			6		2
	176	11420	22.7317	89.2804	DAKHIN NALTA (GAZI PARA)	REHENA BEGUM	GAZI PARA ODUD GAZIR STW	GAZI PARA MASJIDER PASER BARI	Khalilnagar	ODUD GAZI	1800000000	ODUD GAZI	4	16	13		1	23000	1000	9000	120000	3	20	8			1	1	2			5		1	2	2
	177	11427	22.731	89.2782	DAKHIN NALTA (SARDAR PARA)	RASHIDA BEGUM	SARDAR PARA KARIM SARDAR STW	SARDAR PARA KARIM ER BARI	Khalilnagar	MD. KARIM SARDAR	1800000000	MD. KARIM SARDAR	5	13			2	9500	1100	7000	84000	3	14	8			1	1	2			5		2
	181	11994	22.7147	89.2931	GANGARAMPUR (SHEIKH PARA)	NARGIS NAHAR	SHEIKH PARA MASJIDER SAMNE STW	SHEIKH PARA MASJIDER PASHE A. KHALEKER BARI	Khalilnagar	SHEIKH SBDUL KHALEK	1700000000	SHEIKH ABDUL KHALEK	4	27	13	15	1	12000	700	10000	120000	2	15	8			1	1	2	5		5		1	3	2
	182	12001	22.7153	89.2934	GANGARAMPUR	NAZRUL SHEIKH	GANGARAMPUR MADRASAR STW	MADRASAR MATHER SATHE BARI	Khalilnagar	GANGARAMPUR MADRASAR STW	1700000000	SHEIKH NAZRUL ISLAM	4	14	15	6	1	25000	500	15000	180000	2	16	8			2	1	2	5		5		1	3	1
	186	12261	22.7322	89.2754	GONALI	BODIUZZAMAN (TUKU)	ABUL SHEIKHER BARI	SHEIKH PARA JAME MASJIDER PASHE	Khalilnagar	GOVT. DTW	2000000000	MD. ABUL SHEIKH	14	13	23	28	1	80000	1700	25000	300000	2	50	8			1	1	2			5		1	3	1
	187	12363	22.7356	89.2733	GONALI	NIRANJON SARKAR	BAPTIST SCHOOLER NALKUP STW	BAPTIST SCHOOLER PASHE BARI	Khalilnagar	BAPTIST SCHOOLER NALKUP STW	1700000000	NIRANJON SARKAR	5	28	27		1	15000	1000	12000	144000	3	25	8			2	1	2	5		5		1	2	2
	191	12586	22.7626	89.2829	HAZERAKATHI (PURBO PARA)	MONOWARA BEGUM	PURBO PARA TASER GAZI BARI DTW	HAZERAKATHI TASER GAZIR BARI	Khalilnagar	TASER GAZI BARI PASHE GOVT.DTW	1900000000	MD. TASER GAZI	5	16	20		2	3500	1200	6000	75000	3	20	1	2	5	3	6				1		2
	194	12639	22.7603	89.2807	HAZERAKATHI (MOROL PARA)	SUFIA BEGUM	KAHINUR MOROLER BARIR PASE DTW	KAHINUR MOROLER BARIR PASE	Khalilnagar	GOVT. DTW	1700000000	MD. KAHINUR MOROL	5	13			1	20000	1000	20000	240000	1	20	8			1	1	2	5		5		1	3	1
	195	12980	22.7637	89.276	HAZERAKATHI (PASCHIM PARA)	MAHABUR RAHMAN SARDAR	ABDUR ROB ER OWN STW	BAZARER PASCHIM PASHE ROBER BARI	Khalilnagar	ABDUR ROB ER STW	1900000000	MAHABUR RAHMAN	3	14	29	7	1	6000	500	10000	120000	2	12	2			2	1	2			5		1	2	2
	199	13176	22.74	89.2676	HORIS CHANDRAKATHI(P.PARA)	TASLIMA BEGUM	PASCHIM PARA MASJIDER STW	PASCHIM PARA MASJIDER SATHE BARI	Khalilnagar	MASJIDER OWN STW	1900000000	MD. HALIM SHEIKH	3	13			2	2000	180	4000	48000	4	12	8			2	1	2	5		5		2
	200	13214	22.7495	89.2763	MOHANDI (DAKHIN PARA)	RENU BALA	MISSON ER PASHE BARI STW	RENU BALAR OWN BARI	Khalilnagar	RENU BALA	1800000000	RENU BALA	2	13	14	30	2	6000	700	4500	54000	3	10	4	5	9	3	6				1	6	2
	202	13281	22.7271	89.2895	KHALIL NAGAR (KHAN PARA)	ROJINA BEGUM	KHAN PARA REZAUL KHAN BARI DTW	REZAUL KHAN BARI	Khalilnagar	MD. REZAUL KHAN	1900000000	MD. REZAUL KHAN	4	13	14	7	1	6000	1300	10000	120000	3	15	8			1	1	2	5		5		1	2	2
	209	13337	22.7226	89.3007	KHALIL NAGAR (NATH PARA)	RAMPROSAD DEBNATH	RAMPROSAD ER PSF	NATH PARA SCHOOLER PASHE	Khalilnagar	RAMPROSAD DEBNATH	1700000000	RAMPROSAD DEBNATH	8	22	23	12	1	50000	8000	20000	240000	2	30	8			1	1	2	5		5		1	4	1
	210	13429	22.7334	89.2961	KHALIL NAGAR	MOYNA BEGUM	WAHED MOLLAR STW	KHALIL NAGAR GOVT.SCHOOL SATHE BARI	Khalilnagar	WAHED MOLLA	1900000000	WAHED MOLLA	4				1	3000	950	7000	85000	3	13	8			1	1	2	5		5		2
	214	13707	22.7246	89.3072	MASHIARA (MOROL PARA)	KHALEDA BEGUM	LIAKAT KHANER BARIR PASHE DTW		Khalilnagar	MOROL PARA MASJIDER PASHE DTW	1700000000	SHOFIQUL MOROL	3	15	13		1	5000	600	6000	50000	3	10	8			1	1	2			5		1	1	2
	217	14199	22.7171	89.3096	MASHIARA (RISHI PARA)	SWAPNA RANI DAS	DOLIT SCHOOLER PASHE	DOLIT SCHOOLER PASHE	Khalilnagar	GOVT. DTW	1700000000	ROSHIK DAS	4	13			1	4000	200	12000	144000	2	15	8			1	1	2			5		1	1	2
	218	14332	22.7417	89.2834	UTTAR NALTA	REHANA BEGUM	UTTAR NALTA GOVT. PRIMARY SCHOOL	UTTAR NALTA GOVT. PRIMARY SCHOOL	Khalilnagar	GOVT. DTW	1900000000	SHAHINUR SHEIKH	3	16			1	15000	700	8000	100000	3	10	3			1	1	2			5		1	2	2
	223	14488	22.7506	89.2891	MOHANDI (PURBO PARA)	KHANDOKAR JAHIDUL ISLAM	PURBO PARA MASJIDER STW	PURBO PARA MASJIDER PASHE BARI	Khalilnagar	PURBO PARA MASJIDER STW	1700000000	KHANDOKAR JAHIDUL ISLAM	6				1	2000	600	10000	120000	2	30	8			1	1	2			5		1	2	2
	236	16846	22.7086	89.1912	BOYERDANGA	GANESH MONDAL	BOYERDANGA PRIMARY SCHOOL DTW	HINDU PARA GANESH MONDALER BARI	Khalishkhali	BOYERDANGA PRIMARY SCHOOL	1800000000	GANESH MONDAL	4	29			1	2000	300	5000	70000	3	15	3			3	6				1		1	1	3
	237	16847	22.7107	89.1889	BOYERDANGA	LIAKAT ALI SARDAR	SARDAR PARA PSF	SARDAR PARA LIAKAT ALI SARDAR BARI	Khalishkhali	SARDAR PARA PSF	1700000000	LIAKAT ALI SARDAR	5	20			1	4000	300	6000	80000	2	16	8			1	1	2	4	5	5		2
	238	16918	22.7138	89.1897	BOYERDANGA	RASHIDA BEGUM	MOROL PARA MASJID RAJOB ALI STW	MOROL PARA MASJID RAJOB ALI BARI	Khalishkhali	MOROL PARA RAJOB ALI MOROL	1800000000	RAJOB ALI MOROL	6	14	15		1	10000	300	8000	100000	3	20	8			2	2	5			1		2
	239	17118	22.7164	89.1827	DUDHNAI	HASINA BEGUM	SARDAR PARA PSF	SARDAR PARA NUR KASHEM BARI	Khalishkhali	SARDAR PARA GOVT. PSF	1800000000	NUR KASHEM	4	20			1	10000	800	6000	100000	3	15	8			1	1	2	3	4	5		2
	242	17812	22.735	89.189	GANESHPUR	KASHEM SARDAR	SARDAR PARA MASJIDER GOVT. STW	SARDAR PARA KASHEM SARDARER BARI	Khalishkhali	SARDAR PARA MASJIDER GOVT. STW	1700000000	KASHEM SARDAR	4				2	6000	400	8000	100000	3	16	2			2	2	5			1		2
	244	18149	22.7393	89.1815	KADIKATHI	ALOMGIR HOSSAIN GAZI	GAZI PARA BABUR ALI STW	GAZI PARA ALOMGIR GAZIR BARI	Khalishkhali	BABUR ALI GAZI	1800000000	ALOMGIR GAZI	4				2	10000	200	3000	40000	4	12	8			2	2	5			1		2
	246	18251	22.7308	89.184	KHOLISKHALI	ASADUL GAZI	GHOSH PARA FAYEJUDDIN STW	GHOSH PARA FAYEZ UDDINER BARI	Khalishkhali	FAYEZ UDDIN GAZI	1800000000	ASHADUL GAZI	4	30	1	13	1	6000	700	4000	50000	3	15	8			2	2	5			1		1	1	3
	248	18566	22.7425	89.1836	KADIKATHI	GOUR DAS	SREE SHILPI SCHOOLER STW	RISHI PARA GOUR DAS ER BARI	Khalishkhali	SREE SHILPI SCHOOLER STW	1800000000	GOUR DAS	4	30	13	14	2	20000	2500	5000	72000	3	15	8			2	2	5			1		1	1	3
	257	18884	22.7289	89.1878	ANAYETPUR	KHADIZA BEGUM	ANAYETPUR ALAUDDINER STW	ANAYETPUR ALAUDDINER BARI	Khalishkhali	ALAUDDIN SARDAR	1700000000	ALAUDDIN SARDAR	4	13	15		1	5000	300	6000	80000	3	15	8			2	2	5			1		1	1	3
	258	19177	22.7407	89.1835	KADIKATHI	AMOL DAS	RISHI PARA GOVT. DTW	RISHI PARA AMOL DASER BARI	Khalishkhali	RISHI PARA GOVT. DTW	1700000000	AMOL DAS	3				2	600	50	6000	80000	3	10	8			2	2	5			1		2
	263	19540	22.7175	89.199	MONGALANANDA KATHI	ZIARUL SANA	PASCHIM PARA ZIARULER STW	PASCHIM PARA JIARUL ER BARI	Khalishkhali	JIARUL SANA	1800000000	JIARUL SANA	3	13	14	15	1	3000	250	3500	50000	4	10	8			2	2	5			1		1	1	3
	264	19657	22.7457	89.1832	MUKSUDPUR	ASHUTOSH DAS	PURBO PARA ASHUTOSH DASER STW	PURBO PARA ASHUTOSH DASER BARI	Khalishkhali	ASHUTOSH DAS	1800000000	ASHUTOSH DAS	4				1	1000	100	9000	110000	3	17	2			2	2	5			1		1	1	3
	266	19732	22.717	89.1935	MONGANANDA KATHI	MONGAL SHEIKH	SHEIKH PARA MONGAL SHEIKHER STW	SHEIKH PARA MONGAL SHEIKHER BARI	Khalishkhali	MONGAL SHEIKH	1700000000	MONGAL SHEIKH	2				1	15000	800	3000	40000	4	8	8			2	2	5			1		2
	276	20684	22.6675	89.2609	BALIA	TAJBURNESA SARDAR	BALIA BAZARER D.PASHER BARI STW	BALIA BAZARER DAKHIN PASHER BARI	Khesra	AKTER SARDAR	1700000000	AKTAR SARDAR	5	13			1	5000	550	10000	130000	2	18	2			2	5				7		1	1	1
	278	20777	22.6723	89.2584	BALIA	FATEMA BEGUM	MOROL PARA KAMAL MOROLER STW	MOROL PARA SHEIKHER ALI BARI	Khesra	KAMAL MOROL	1800000000	JAMAL MOROL	5	29	14		1	4500	200	4000	50000	3	18	7			2	2	5			1		1	1	1
	281	20964	22.6445	89.2354	HORIHORNAHAR (MOROL PARA)	SALEHA BEGUM	BAZARER PASHE MOSLEM MOROL STW	BAKER MOROL ER BARI	Khesra	BAKER ALI MOROL	1800000000	MD. MOSLEM MOROL	7	12	13		2	7000	1100	9000	108000	3	22	8			1	1	2			5		2
	282	21011	22.6428	89.223	SHAHAPUR	MOLLIKA SARKAR	D. SHAHAPUR SCHOOLER PASHER BARI	D. SHAHAPUR DURGA MONDIRER PASHAR BARI	Khesra	KALIDAS MONDAL	1700000000	KALIDAS MONDAL	4	29	13		1	4000	150	3000	40000	3	13	8			2	1	2	5		5		2
	285	21149	22.6558	89.2782	SHAHAZADPUR	MOTIUR RAHMAN	SHAHAZADPUR MOZIBAR RAHMANER	SHAHAZADPUR MOZIBAR RAHMANER BARI	Khesra	MOZIBAR	1700000000	MOTIUR RAHMAN	4	29	8		1	4000	500	4000	50000	3	15	2	4		3	5				1		1	1	1
	287	21602	22.6648	89.1752	HORINKHOLA	GAZI RANI SARKAR	SARKARPAR ANOKUL SARKARER STW	SARKARPAR ANOKUL MASTERER BARI	Khesra	ANOKUL SARKAR	1700000000	ANOKUL SARKAR	3				1	100000	1000	15000	200000	2	12	2			2	2	5			1		1	2	3
	288	21618	22.6634	89.1755	HORINKHOLA	HORIDASH MONDAL	DOKHIN PARA TOBEN MONDAL STW	DOKHIN PARA TOBEN MONDAL BARI	Khesra	BHOBEN MONDAL	1700000000	BHOBEN MONDAL	6				1	9000	200	10000	150000	2	20	2			2	2	5			1		1	1	3
	289	21731	22.6491	89.2338	HORIHOR NAGAR (SARDAR PARA)	KHADIZA BEGUM	LIYAKOT HOSSAIN MORALER STW	SARDAR PARA MOSQUEDER PASHA LIYAKOTER BARI	Khesra	LIYAKOT HOSSAIN MORAL	1700000000	LIYAKOT HOSSAIN MORAL	4	13	15	30	2	12000	750	8000	96000	3	10	8			1	1	2	5		5		2
	290	21804	22.6488	89.2354	HORIHOR NAGAR (MODAH PARA)	SALMA BEGUM	ABUL KASHEMER STW	MODAH PARA ABUL KASHEM MORALER BARI	Khesra	ABUL KASHEM MORAL	1700000000	ABUL KASHEM MORAL	5	1			2	8000	3500	8000	96000	3	15	8			1	1	2	5		5		1	3	1
	291	21885	22.6526	89.2373	HORIHOR NAGAR	MONOWARA BEGUM	GAZIPARA AFSAR GAZIR STW	GAZIPARA PAKA RODER PASHER BARI	Khesra	AFSAR GAZI	1800000000	ENAYAT GAZI	4				1	4000	200	3500	40000	3	14	2			2	1	5			5		2
	292	21887	22.6498	89.2382	HORIHOR NAGAR	BONANI BEGUM	MAINUL MASTERER BARIR TUBEWELL	HORIHOR NAGAR MAINUL MASTERER BARI	Khesra	MAINUL MASTER	1700000000	MAINUL MASTER	5	14			1	75000	1000	15000	230000	1	18	2			2	5				5		1	1	1
	293	21888	22.6515	89.2375	HORIHOR NAGAR	ASMA KHATUN	HORIHORI NAGAR PAKA ROADER PASE	HORIHOR NAGAR PAKA RODER PASHER BARI	Khesra	ABU TALEB MORAL	1700000000	OSMAN ALI MORAL	4	13			1	7000	400	12000	150000	2	15	8			3	1	2			5		1	1	3
	294	21987	22.6534	89.2456	MURAGASA	HAMIDA BEGUM	MURAGASA SARDAR PARA	MURAGASA BRAC FILTARER BARIR PASHE	Khesra	BRAC FILTER	1700000000	GIYASH UDDIN GAZI	3	13			1	4000	200	6000	75000	2	12	8			1	1	2			5		1	1	1
	295	22076	22.6746	89.2558	TEGHORIYA	MAYARANI GHOSH	TEGHORIYA BRAC FILTER	TEGHORIYA BRAC FILTERER PASHER BARI	Khesra	BRAC FILTER	1700000000	MONORANZON GHOSH	4				1	4000	100	15000	210000	2	7	8			1	1	2			5		1	1	3
	296	22077	22.6462	89.2446	KHESHRA	TANIYA SULTANA	KHESHRA LIYAKOT CHAIRMANER BARI PSF	GAZIPARA KAMRUL ISLAMER BARI	Khesra	LIYAKOT CHAIRMAN	1700000000	MD. KAMRUL ISLAM	5	13			1	4000	200	5500	60000	2	15	8			1	1	2	5		5		1	1	1
	299	22246	22.6509	89.2696	KHESHRA	REKHA DASH	POSCHIM PARA PUJA MONDIRER STW	MONDIRER PASHER BARI	Khesra	PUJA MONDIR	1800000000	NARAYON DAS	4	13			1	4000	120	3000	40000	3	17	8			2	1	2			5		2
	300	22306	22.6436	89.2241	SAHAPUR	PURNIMA MONDAL	SAHAPUR MALOPARA	SAHAPUR MALO PARA RAMANDER BARI	Khesra	GOBINDO MONDAL	1700000000	RAMANDO MONDAL	3				1	4000	50	3000	35000	3	10	7			2	2				5		2
	302	23062	22.6554	89.2431	HORIHAR NAGAR	KOLPONA SAN	MURAGASA SARPUKURER PASHER BARI	MURAGASA SARPUKUR	Khesra	BIMOL SAN	1700000000	BIMOL SAN	2				1	4000	700	4000	45000	3	7	8			2	5				1		1	1	1
	304	23355	22.6444	89.2353	HORIHAR NAGAR (MORAL PARA)	FAIMA BEGUM	BAZARER PASHA AZIZ SHANAR STW	A. AZIZ SHANAR BARI	Khesra	A. AZIZ SHANA	1800000000	MD. BOZLU SHANA	5	5	6		2	16000	13000	10000	120000	3	20	8			1	1	2			5		2
	305	23652	22.6378	89.2824	SHAZAD PUR	HIRA BEGUM	MORAL PARA ASHRAF MORALER BARI	MORAL PARA AMINUR MORALER BARI	Khesra	AMINUR MORAL	1700000000	ASAFUR RAHMAN MORAL	3	29	13		1	5000	250	4000	50000	3	10	1	2		3	5				7		2
	306	23654	22.6376	89.2807	SHAZAD PUR	ASMA BEGUM	GAZI PARA AKSED GAZIR BARI	GAZI PARA AKSED GAZIR BARI	Khesra	AKSED GAZI	1700000000	MASUD RANA GAZI	5	29	13		1	5000	500	3000	35000	3	18	2			3	5				5		2
	307	92077	22.6381	89.2719	KHESRA	DEBROT KUMAR DAS	D. PARA SUNIL MEMBARER BARI	SUNIL MEMBARER BARI	Khesra	SUNIL MUMAR DAS	1900000000	DEBROT KUMAR DAS	4	1			1	4000	200	8000	95000	2	18	8			1	1	2			5		1	1	1
	308	23716	22.6481	89.2836	SHAZAD PUR	KHAIRUN BEGUM	PUBALI PARA SARKAR STW	PUBALI PARA RAHMAT GAZIR BARI	Khesra	PUBALI PARA SARKAR STW	2000000000	RAHMAT GAZI	5	13			1	6500	270	4000	50000	3	18	8			2	1	2			5		1	1	1
	310	23832	22.6439	89.2264	SHAHA PUR	LIYAKOT GAZI	GAZI PARA KACHA ROADER PASHE STW	GAZI PARA KACHA RODER PASHA	Khesra	LIYAKOT GAZI	1700000000	LIYAKOT GAZI	2				1	2500	100	3000	37000	3	5	8			2	5				5		2
	311	23848	22.6449	89.2308	SHAHA PUR	AKTAR BANU	SHAHA PUR GAZI PARA	GAZI PARA ALI GAZIR BARI	Khesra	ALI GAZI	1800000000	A. AZIZ GAZI	2				1	3000	100	3200	38000	3	7	8			2	1	2			5		2
	315	24140	22.6447	89.2865	SHAHAZADPUR	RUPALI BEGUM	MIRAZADER STW	SHAHAZAD PUR MIR AZADER BARI	Khesra	MIR AZAD	1900000000	MIR MOZAFFAR	3				1	4000	200	4000	45000	3	8	2	3		3	5				9		2
	317	24339	22.6597	89.2519	SHALIKHA	ROHIMA BEGUM	SHALIKHA GUSCHO GRAM ROBIULER	GUSCHO GRAM ROBIULER BARI PASHE	Khesra	ROBIUL GAZI	1700000000	MONIRUL GAZI	3	1	13		1	4000	300	4000	50000	2	7	8			2	1	2			5		2
	318	24365	22.6604	89.251	SHALIKHA	AKBAR MORAL	SHALIKHA GUSCHO GRAM S.P. SCHOOL	SHALIKHA GUSCHO GRAM S. P. SCHOOLER PASE	Khesra	GUSCHO GRAM S. P. SCHOOL	1800000000	AKBAR MORAL	3				1	15000	800	2500	30000	3	10	8			2	1	2			1		2
	319	24622	22.6754	89.2559	TEGHORIYA	APORNA KARSHORUPI	TEGHORIYA S.P. SCHOOL	TEGHORIYA SCHOOLER PASHER BARI	Khesra	TEGHORIYA SCHOOL DTW	1700000000	PRODIPTO KARSHORPI	3				1	6000	200	6000	80000	3	13	2	3	5	3	5				1	9	2
	320	24630	22.6754	89.2559	TEGHORIYA	ASMA BEGUM	TEGHORIYA	PAKA ROADER UTTOR PASHA	Khesra	TEGHOREYA S. P. SCHOOL	1900000000	JAHANGIR MORAL	4	28	13		1	7000	800	4000	50000	3	17	2	3		3	5				1	9	2
	329	25474	22.8019	89.1796	DADPUR	RAHILA KHATUN	DOKHIN PARA SHEKH ALAUDDIN STW	DOKHIN PARA SHEKH ALAUDDINER BARI	Kumira	SHEKH ALAUDDIN	1800000000	RAHILA KHATUN	5	29	31		2	2000	150	8000	100000	3	16	2			3	6				1		1	1	3
	332	25690	22.8059	89.1893	GOURIPUR	SAHANARA BEGUM	UTTOR PARA SAHAJAN SHEKHER STW	UTTOR PARA KORIM SHEKHER BARI	Kumira	SAHAJAHAN SHEKHER STW	1900000000	KORIM SHEKH	4	6	13		2	7000	500	3000	4000	4	15	2			2	5				1		2
	340	26085	22.7701	89.1776	KUMIRA	BISHOZIT GHOS	KUMIRA PAILOT BALIKA SCHOOL	UTTOR PARA SHONZIT KUMAR GHOSER BARI	Kumira	KUMIRA PAILOT BALIKA SCHOOL	1900000000	SHONZIT KUMAR GHOSH	6				1	30000	1000	12000	180000	2	24	3			2	2	5			1		1	2	3
	342	26092	22.7881	89.1911	KUMIRA	SHAHIDA BEGUM	SHEKH PARA SARKARI DTW	SHEKH PARA SAHABUDDIN SHEKHER BARI	Kumira	SHEKH PARA SARKARI DTW	1700000000	SAHABUDDIN SHEKH	3	13	14	15	1	12000	1000	4000	50000	3	12	8			2	2	4	5		5		2
	344	26099	22.7631	89.1886	KUMIRA	TANZILA BEGUM	BAGDAH BAZARER UTTORDIKER DTW	BAGDAH BAZARER UTTORDIKER RAHMAT ALIR BARI	Kumira	UTTORAN NGO DTW	1800000000	RAHMAT ALI MORAL	5	30	13		1	16000	2000	9000	120000	3	18	8			2	2	4	5		5		2
	350	26569	22.759	89.1797	KUMIRA	BILLAL BISWAS	DOKHINPARA AJAHARUL BISWAS STW	DOKHINPARA AJAHARUL BISWAS STW	Kumira	AJAHARUL BISWAS	1800000000	AJAHARUL BISWAS	4	30			1	15000	1500	6000	80000	3	20	2			2	5				1		2
	351	26633	22.7707	89.1802	KUMIRA	MD. FARUK HOSSAN	MOHILA COLLEGER PURBOPASHA STW	MOHILA COLLEGER PURBOPASHA A.ROHIMER BARI	Kumira	A. ROHIMER MOLLA	1700000000	A. ROHIMER MOLLA	6	33	30		1	1200	100	10000	120000	2	22	2			3	6				1		1	1	1
	352	26661	22.7696	89.1763	KUMIRA	AYESHA BEGUM	KODAMTOLA BAZARER POSCHIM PASHE STW	KODAMTOLA BAZARER POSCHIM PASHA SAHHINUR BARI	Kumira	AMINUR MORAL	1700000000	SHAHINUR MORAL	2				1	5000	300	7000	90000	3	10	8			2	1	2	5		5		2
	353	26662	22.7699	89.1754	KUMIRA	HASHEM ALI SARDAR	POSCHIM PARA HASHEM ALI SARDAR STW	KODAMTOLA BAZARER POSCHIM PASHA HASEMALIR BARI	Kumira	HASHEM ALI SARDAR	1700000000	HASHEM ALI SARDAR	4	16			1	25000	6000	5000	60000	3	16	8			2	2	5			1		2
	354	26663	22.7704	89.1894	KUMIRA	MUSLIMA BEGUM	MORAL PARA ARSHAD ALI MORAL STW	MORAL PARA ARSHAD ALI MORAL BARI	Kumira	ARSHAD ALI MORAL	1800000000	OHAB ALI MORAL	6				1	2000	200	6000	85000	3	20	2	5		3	6				1		1	1	1
	355	26884	22.7699	89.1726	KUMIRA	SHORMOTI BHOTTACHARGE	KUMIRA BAZARER UTTOR PASHER PRRA STW	KUMIRA BAZARER UTTOR PASHER MASTER BARI	Kumira	GOBINDO BHOTTACHANGE	1700000000	GOBINDO BHOTTACHARGE	4				1	20000	1000	20000	240000	2	14	2			3	6				1		1	2	1
	360	27539	22.7694	89.2018	MONOHAR PUR	NOWSHER ALI DALAL	DALAL PARA MOSQUER DTW	DALAL PARA NOWSHER ALI BARI	Kumira	DALAL PUR MOSQUER DTW	1700000000	NOWSHER ALI DALAL	3				1	3000	200	2500	32000	3	12	6			2	2	5			1		2
	368	28066	22.7891	89.1735	RARI PARA	MOHDEB SHOR	POSCHIM PALPARA SARKARI DTW	MAJHER PARA MOHDEBSHORER BARI	Kumira	POSCHIM PARA PALPARA SARKARI DTW	1800000000	MOHADEB SHORE	2				1	5000	600	5000	80000	3	7	8			2	1	2	5		5		2
	375	28240	22.813	89.1844	SANPUR	ALEYA BEGUM	SARDAR PARA MOSQUER DTW	SARDAR PARA MOSQUER PASHE AKTER BARI	Kumira	SARDAR PARA MOSQUER DTW	1900000000	AKTARUZZAMAN SARDAR	3	13			2	4500	500	7500	100000	3	10	8			2	1	2	5		5		2
	377	28242	22.8095	89.1876	SANPUR	SHAHIDA BEGUM	SANPUR PRIMARI SCHOOL DTW	SANPUR PRIMARI SCHOOLER PASHA	Kumira	SANPARA PRIMARI SCHOOLER DTW	1700000000	SHOWKAT SHEKH	3	30			1	3000	300	3000	40000	3	11	8			2	1	2	5		5		2
	382	28310	22.8055	89.1969	GOURIPUR	SAFALI BEGUM	UTTAR PARA MIZAN SHEKHER STW	UTTOR PARA MIZAN SHEKHER BARI	Kumira	MIZAN SHEKHER STW	1700000000	MIZAN SHEKH	5	13	14	15	1	4500	400	6000	80000	3	18	2			3					6		2
	383	28352	22.8111	89.1872	SANPUR	MONOWARA BEGUM	SHEKH PARA MOSQUER STW	SHEKH PARA MOSQUEW PASHA A. HALIMER BARI	Kumira	SHEKH PARA MOSQUER STW	1800000000	A. HALIM SHEKH	3	13	14		2	70000	10000	8000	100000	3	12	2			2	2				1		2
	384	28385	22.8131	89.1815	SANPUR	JAHANARA BEGUM	MATHPARA ROBIULER STW	MATHPARA ROBIULER SARDAR BARI	Kumira	ROBIUL SARDAR	1900000000	SHORIFUL SARDAR	2	13	14	15	1	7000	500	2000	25000	4	6	2			3	6				1		2
	385	28439	22.7331	89.2079	BOLRAMPUR	SHOTOZIT MONDAL	BOLRAMPUR S. P. SCHOOL	BOLRAMPUR S.P. SCHOOLER PASHA	Magura	BOLRAMPUR S. P. SCHOOL	1700000000	SHOTOZIT MONDAL	4				1	500	50	20000	230000	2	25	8			2	1	2	5		5		1	3	2
	387	28756	22.7172	89.2168	BISHNU KATI	A. SATTAR BISWAS	BISHNU KATI S.P. SCHOOL	PURBOPARA SCHOOLER PASHE	Magura	BISHNU KATI S.P. SCHOOL	2000000000	A. SATTAR BISWAS	3	13	14	15	2	10000	1000	5000	50000	3	10	2			3	4				7		1	2	2
	388	28860	22.7218	89.2106	BALIYADAH	MST. DOLI BEGUM	BALIYADAH UTTOR PARA	BALIYADAH UTTOR PARA MOSQUER PASHA	Magura	ISLAM SARDAR	1800000000	ISLAM SARDAR	2				2	1000	50	6000	60000	3	8	8			2	5				1		1	1	2
	389	28944	22.7294	89.2406	BARUI PARA	KRISHNA DAS	BARUI PARA DAS PARA	BARUI PARA DAS PARA	Magura	BARUIPARA GOVT. DTW	1700000000	SHONKAR DAS	4	13	14	15	1	16000	1500	4000	45000	3	10	5			2	4	5			5		1	1	4
	391	29176	22.7425	89.2004	BOLRAMPUR	SHATI AKTER	S.P. SCHOOL BOLRAMPUR	BOLRAMPUR POSCHIM PARA S.P. SCHOOL	Magura	S.P. SCHOOL BOLRAMPUR	1800000000	MD. KOLIM UDDIN MUNSHI	4				1	3000	300	5500	60000	3	20	8			2	2	4	5		5		1	1	3
	396	29353	22.7386	89.2069	BOLRAMPUR	ABBAS ALI	BOLRAMPUR MALIPARA MOSQUE	BOLRAMPUR MALI PARA	Magura	BOLRAMPUR MOSQUE	1900000000	ABU DAUD	3				1	12000	300	7000	80000	3	12	8			2	2	5			5		1	2	2
	397	29362	22.7381	89.2077	BOLRAMPUR	SHAHIDA	BOLRAMPUR MALI PARA	MALI PARA	Magura	SHOBUJ MALI	1700000000	MD. SIRAJ MALI	4	13	14	15	1	15000	2000	7000	70000	3	15	8			2	2				5		1	1	2
	398	29538	22.7228	89.2167	CHAND KATI	MONOWARA BEGUM	CHAND KATI BAZARER PASHA	CHANDKATI BAZARER PASHE	Magura	HAZRAT ALI BISWAS	1700000000	HAZRAT ALI BISWAS	6	13			1	6000	1000	40000	480000	2	20	2			3	5				7		1	2	1
	399	29539	22.7262	89.2202	CHAND KATI	SALMA BANU	CHAND KATI MODHO PARA	CHANDKATI MODHO PARA	Magura	MOYNUL ISLAM	1700000000	CHANDKATI MODHO PARA	7	12	6		1	20000	2000	85000	1000000	1	25	2			2	5				5		1	3	1
	400	29656	22.7222	89.218	ROGHUNATH PUR	SURIR ALI BISWAS	CHANDKATI BAZARER PASHE	CHANDKATI BAZARER PASHE	Magura	SUBIR ALI BISWAS	1800000000	SUBIR ALI BISWAS	5				1	3000	200	5000	55000	2	15	8			2	5				5		1	1	2
	406	29876	22.7378	89.2502	CHARGRAM	MD. SIRAZUL ISLAM SARDAR	CHARPARA FOKIR PARA MOSQUER PARA	CHARPARA FOKIR PARA MOSQUER PASHE	Magura	CHARPARA FOKIR PARA JAME MOSQU	1900000000	MD. SIRAZUL ISLAM SARDAR	9	13	14	15	1	25000	6000	12000	120000	3	25	8			2	5				5		1	1	2
	407	30094	22.7353	89.2503	CHARGRAM	SHIKHA RANI KHA	CHARGRAM KHA PARA	CHARGRAM KHA PARA	Magura	SHONTOSH KHA	2000000000	SHONTOSH KHA	8				1	20000	2000	15000	160000	2	20	8			2	5				5		1	2	2
	411	30361	22.7256	89.2526	DHULANDA	SHOHEL SHEKH	DHULANDA SHEKH PARA	DHULANDA SHEKH PARA	Magura	GOFUR SHEKH	1700000000	SHOWKAT ALI SHEKH	9	13	14	15	1	2000	300	10000	110000	2	35	7			2	5				5		1	2	2
	415	30667	22.7344	89.2504	CHARGRAM	JAMPIYA	CHARGRAM S.P. SCHOOL	CHARGRAM S.P. SCHOOL	Magura	CHARGRAM S.P. SCHOOL	1800000000	YEAKHAN	4	23	28		1	50000	15000	5000	55000	3	10	8			2	4				5		1	1	2
	418	30670	22.7262	89.2352	MAGURA	DILIP BISWAS	MAGURA MASH BAZARER	MAGURA MASH BAZARER PASHE	Magura	MAGURA BAZAR SHOMITA	1700000000	DILIP BISWAS	2				1	5000	500	6000	70000	3	6	3			2	5				9		1	2	2
	419	30672	22.7352	89.2457	BARUIPARA	NIRMOL PAUL	CHARGRAM DOTTOPARA	BARUIPARA DOTTOPARA	Magura	CHARGRAM DOTTOPARA GOVT. DTW	1700000000	NIRMOL PAUL	5	23			1	45000	4000	10000	115000	2	20	8			2	4	5			5		1	3	1
	423	30802	22.7234	89.224	MAGURA	FERDOUSI	MAGURA BACHPARA	MAGURA BACHPARA	Magura	UZIR ALI SARDAR	1700000000	UZIR ALI SARDAR	3	13	14	15	1	6000	500	7000	60000	3	10	1			2	5				5		1	1	2
	424	30803	22.7229	89.2329	MAGURA	AMZAD HOSSAN	MAGURA S.P. SCHOOL	MAGURA S.P. SCHOOL	Magura	MAGURA S.P. SCHOOL	1700000000	AMZAD HOSSAIN	6				1	7000	600	17000	200000	2	20	1			2	5				5		1	3	1
	425	30848	22.7171	89.2397	MAGURA	AZUN BODDO	MAGURA PURBO PARA	MAGURA PURBOPARA	Magura	BHOLANATH BAIDDO	1800000000	BHOLANATH BODDO	4	13	14		1	6000	500	7000	75000	3	10	2			2	5				7		1	1	1
	426	30852	22.7253	89.2299	MAGURA	ROZINA	MAGURA GAZI PARA	MAGURA GAZI PARA	Magura	YEASIN GAZI	1700000000	YEASIN GAZI	3	1	13		2	3000	500	6000	50000	3	7	8			2	5				5		1	1	2
	428	30985	22.7259	89.236	MAGURA	MOYNA BISWAS	MAGURA MALO PARA	MAGURA MALO PARA	Magura	SUBOL BISWAS	1800000000	SHOBUL BISWAS	6	12	6		1	12000	1000	10000	115000	3	20	2			2	5				4		1	1	2
	429	30986	22.7254	89.2332	MAGURA	JAHANARA	MAGURA SHEKH PARA DARBAR PASHE	MAGURA DARGAR PASHE	Magura	ARIFUL ISLAM RIKU	1700000000	ARIFUL ISLAM ZIKU	4	23	12		1	12000	1000	12000	130000	2	16	8			2	5				5		1	2	2
	430	30987	22.7257	89.2334	MAGURA	NAZMA BEGUM	MAGURA DARGAR SHEKH PARA	MAGURA DARGA SHEKH PARA	Magura	SHEKH ATIYAR RAHMAN	1800000000	SHEKH ATIYAR RAHMAN	6	1	14	16	2	13000	1500	5000	55000	3	20	2			2	5				7		1	1	2
	431	30990	22.7286	89.2252	CHAND KATI	JANNATUL FERDOUS	CHAND KATI MORAL PARA	CHAND KATI MORAL PARA	Magura	HADIZUL MORAL	2000000000	HADIZUL MORAL	4	1			2	1500	200	5000	55000	2	17	1			2	5				5		1	1	2
	432	31007	22.7268	89.2216	CHAND KATI	ASMA	CHANDKATI MAZHER PARA	CHANDKATI MAZHER PARA	Magura	GOLAM MOSTOFA	1700000000	GOLAM MOSTOFA	4	13	23		2	10000	1500	5000	50000	2	15	8			2	5				5		1	1	2
	436	31320	22.7094	89.2276	MAGURA DANGA	DOLI MONDAL	MAGURA DANGA MONDAL PARA	MAGURA DANGA MONDAL PARA	Magura	SUKUMAR MONDAL	1800000000	SUKUMAR MONDAL	6	13			1	6000	500	5000	58000	3	25	8			2	5				5		1	1	2
	437	31413	22.7195	89.2254	MAGURA DANGA	ABUL HOSSAN	NATHPARA MAGURA DANGA	MAGURA DANGA SHEKH PARA	Magura	NATHPARA DAKHIL MADRASHA MAGURA	1800000000	ABUL HOSSAIN	4				2	20000	2000	6000	70000	3	15	8			2	4				5		1	1	1
	438	31500	22.7035	89.2253	MAGURA DANGA	URMILA	MAGURA DANGA DAKHIN PARA	MAGURA DANGA S. PARA	Magura	NIROD RAI	1800000000	NIROD RAI	6	12			1	50000	1500	5000	55000	3	18	8			2	4	5			5		1	1	2
	439	31517	22.7035	89.2248	MAGURA DANGA	RAM RAI	MAGURA DANGA DAKHIN PARA	MAGURA DANGA S. PARA	Magura	KHOKON RAI	1700000000	KHOKON RAI	10	13			1	20000	14000	7000	80000	3	30	1	2		2	4				7		1	1	2
	442	31557	22.6931	89.2104	MAGURA	BONITA SARKAR	MADRA SARDAR PARA	MADRA SARDAR PARA	Magura	PROSHAD SARKAR		PROSHAD SARKAR	8	13			1	5000	500	20000	320000	1	25	8			2	1	2	4	5	5		1	2	2	2015-08-23	12.41	31.5	2015-08-23	12.41	881	2015-08-23	12.38	0	2015-08-23	12.36	0
	443	31766	22.6942	89.2141	MADRA	GOSAI SARKAR	MADRA KACHI SARDAR PARA	MADRA KACHI SARDAR PARA	Magura	GOSAI SARKAR	1800000000	GOSHAI SARKAR	6	13			1	4000	500	5000	5000	3	15	8			2	5				1		1	1	4
	444	31768	22.6947	89.2189	MADRA	BASHUDEB MONDAL	MADRA PURBOPARA	MADRA PURBO PARA	Magura	BASHUDAB MONDAL	1700000000	BASHUDAB	6	13	14	15	1	4000	1000	5000	55000	3	20	8			2	5				5		1	2	2
	446	31914	22.6956	89.2159	MADRA	SABITRI MONDAL	MADRA PRIMARI SCHOOL PASHE	MADRA MAJHER PARA	Magura	SHONJOY MONDAL	1800000000	SHONJOY MONDAL	4	28	14	13	2	60000	2000	4500	50000	3	12	2			3	5				10		1	1	2
	451	32285	22.728	89.1095	BAKKHALI	SHRABONTI	BAKKHALI	BAKKHALI	Nagarghata	UTTARON	1700000000	SUNIL	6	13			1	15000	1000	6000	65000	3	25	2			3	5				7		1	1	2
	455	32461	22.7813	89.1104	NAGARGHATA	S.M. SHORIFUL ALAM	ATAUR CHOOSING CENTRE PORAR STW	ATAUR CHOOSING CENTRE SHARIFUL BARI	Nagarghata	S.M. SHORIFUL ALAM	1700000000	S.M. SHORIFUL ALAM	5				1	5000	2500	5000	80000	2	17	2			2	5				1		1	2	3
	456	32464	22.7827	89.1093	NAGARGHATA	MOKLESUR RAHMAN	BAGH PARA, PORA BAZAR ATIAR STW	BAGH PARA PORA BAZAR UTTAR ATIAR BARI	Nagarghata	ATIAR RAHMAN	1700000000	ATIAR RAHMAN	6	13	14		1	6500	1500	20000	240000	2	20	2			3	6				1		1	1	3
	460	32708	22.769	89.1111	DAKHIN NAGARGHATA	TANJILA BEGUM	SARDAR PARA. GOLAM SARDAR	SARDAR PARA. GOLAM SARDAR BARI	Nagarghata	GOLAM SARDAR	1700000000	GOLAM SARDAR	5	30			1	7000	300	8000	100000	3	18	2			2	5				1		1	1	3
	461	32732	22.7694	89.1111	DAKHIN NAGARGHATA	KHODEZA BEGUM	DAKHIN PARA,MUNSUR THIKADAR DTW	DAKHIN PARA,MUNSUR THIKADAR BARI	Nagarghata	MUNSUR SARDAR	1700000000	MUNSUR SARDAR	4	30	13		1	30000	5000	15000	200000	2	15	8			2	2	4	5		5		2
	462	32871	22.7832	89.104	GABTALI	ABDUL MAJID SARDAR	SARDAR PARA MASJIDER STW	SARDAR PARA ABDUL MAJIDER BARI	Nagarghata	SARDAR PARA MASJIDER STW	1800000000	ABDUL MAJID SARDAR	3				2	18000	600	5000	60000	3	12	8			2	2	5			5		2
	463	32899	22.7856	89.1005	GABTALI	ABDUL SOBHAN ANSARI	SOKARKANDA DIGHIR PURBO PARE STW	SOKARKANDA DIGHIR PURBO PARE SOBHANER BARI	Nagarghata	ABDUL SOBHAN ANSARI	1800000000	ABDUL SOBHAN ANSARI	10	30	13	14	2	20000	6000	25000	300000	2	35	2			3	5				1		1	2	3
	466	32931	22.7836	89.1019	GABTALI	KAJOL BEGUM	SARDAR PARA GAFUR SARDARER STW	SARDAR PARA FAZLUR SARDARER BARI	Nagarghata	GAFUR SARDAR STW	1800000000	FAZLUR SARDA	4	30	13	14	1	15000	1200	5000	70000	3	14	2			2	2	5			1		2
	473	33274	22.7418	89.1334	HORINKHOLA	BARUNA	HORINKHOLA UTTAR PARA	HORINKHOLA UTTAR PARA	Nagarghata	NEPAL	2000000000	HORE KESTO	4				1	4000	600	4000	42000	3	13	7			2	2				5		1	1	2
	475	33592	22.7732	89.1093	HAJORTALA	SHEULI BEGUM	HAJORTALA SHHADAT ANSARI STW	HAJORTALA SAIFUL ANSARI BARI	Nagarghata	SAHADAT ANSARI	1800000000	SAIFUL ISLAM ANSARI	4	13	14	15	2	7500	500	6000	80000	3	12	2			3	5				1		2
	476	33620	22.7682	89.1163	MOTHBARI	HAYDAR ALI SARDA	MOTHBARI HAYDAR ALI STW	MOTHBARI HAYDAR ALI SARDAR BARI	Nagarghata	HAYDAR ALI SARDAR	1700000000	HAYDAR ALI SARDAR	3	13	14	15	1	10000	1500	5000	75000	3	10	2			3	5				1		1	1	1
	482	34306	22.7836	89.101	GABTALA	FAZILA BEGUM	PANDIT PARA, TAJEL SARDAR STW	PANDIT PARA, TAJEL SARDAR BARI	Nagarghata	TAJEL SARDAR	1900000000	TAJEL SARDAR	3				1	3000	200	3000	40000	3	10	8			2	2	5			1		2
	483	34341	22.7807	89.1119	NAGARGHATA	KADVANU	RICE MILL MORE ALOMGIR STW	RICE MILL MORE PASE KADVANU BARI	Nagarghata	ALOMGIR SARDAR	1700000000	KADVANU	2				2	15000	1000	3000	40000	4	7	8			2	2	5			1		2
	484	34342	22.7803	89.1134	NAGARGHATA	SALAUDDIN SARDAR	BAGHERKHAL PARA, SALAUDDIN STW	BAGHERKHAL PARA SALAUDDINER BARI	Nagarghata	SALAUDDIN SARDAR	1800000000	SALAUDDIN SARDAR	4				1	2000	100	7000	100000	3	12	8			2	2	5			5		2
	485	34345	22.7823	89.1016	GABTALI	JAHUR ALI SARDAR	SARDAR PARA JAHUR ALI STW	SARDAR PARA JAHUR ALI SARDAR BARI	Nagarghata	JAHUR ALI SARDAR	1700000000	JAHUR ALI SARDAR	3	13	14	15	1	6500	500	6000	80000	3	10	8			2	2	5			1		1	2	1
	487	34378	22.7696	89.1078	NIMTALA	DURGA RAN SARKAR	NIMTALA UTTAR PARA	NIMTALA UTTAR PARA	Nagarghata	NIMTALA UTTAR PARA GOVT. DTW	1700000000	SANJOY SARKAR	4	8			1	15000	1000	8000	90000	3	16	7			2	2				5		1	2	1
	488	34379	22.7727	89.116	NAGARGHATA	PORITOSH BANERJYE	KALI BARI, SETUR, PSF	KALI BARI PORITOSH BANERJYER BARI	Nagarghata	KALI BARI, SETUR, PSF	1700000000	PORITOSH BANERJYE	6				1	7000	1200	15000	250000	2	20	8			1	1	2	4	5	5		2
	490	34463	22.7774	89.1192	NAGARGHATA	BEAUTI BEGUM	RISHI PARA RISHILPI SCHOOL STW	SHEIKH PARA, AZIZUL SHEIKH BARI	Nagarghata	RISHILPI SCHOOL STW	1900000000	AZIZUL SHEIKH	4	13	14		1	6000	400	6000	90000	3	13	2			2	2	5			1		1	1	3
	492	34531	22.7649	89.1085	NIMTALAATA	ANIMA BAIRAGI	NIMTALA DAKHIN PARA	NIMTALA DAKHIN PARA	Nagarghata	NIMTALA DAKHIN PARA GOVT. DTW	1800000000	MONGAL BAORAGI	2				1	5000	2000	5000	50000	3	5	3			2	2				5		1	1	2
	498	35147	22.7536	89.1675	JUJKHOLA (PASCHIM PARA)	MD. MATIAR RAHMAN MOROL	P.PARA BAITUL AMAN MASJID STW	BAITUL AMAN MASJIDER PASE MATIARER BARI	Sarulia	MASJIDE STW	1700000000	MD. MATIAR RAHMAN MOROL	7	21	12		1	30000	1500	12000	144000	3	25	8			2	1	2	5		5		1	2	1
	500	35213	22.7471	89.1636	AMTOLARDANGI	MAKBUL SARDAR	AMTOLARDANGI MASJIDER STW	MAJHER PARA MASJIDER PASHER BARI	Sarulia	GOVT. STW	1800000000	MAKBUL SARDAR	6	13	14	15	2	6000	700	8000	100000	3	20	8			2	1	2	5		5		1	5	1
	503	35973	22.8027	89.1697	BARO KASHIPUR (KHAN PARA)	MD. HEKMAT ALI KHAN	HEKMAT ALI KHANER DTW	MADRASAR PURBO PASHE OWN BARI	Sarulia	MD. HEKMAT ALI KHAN	1900000000	MD. HEKMAT ALI KHAN	7	12	14	13	1	13000	1200	16000	192000	2	25	8			1	1	2	5		5		2
	504	35974	22.8051	89.169	BARO KASHIPUR (MADRASAR PASHE)	NAZMA BEGUM	MADRASAR PASHE TUHINER DTW	MADRASAR PASHE TUHINER BARI	Sarulia	SHEIKH TUHINUR ISLAM	1700000000	SHEIKH TUHINUR ISLAM	6	13	14	15	1	30000	1000	10000	120000	3	20	8			1	1	2	5		5		2
	506	35993	22.806	89.1696	BARO KASHIPUR (MADYA PARA)	SHEIKH MUKITUZZAMAN	M.P.MOZIBUR RAHMAN DTW	KASHIPUR MOZIBUR RAHMAN M.P	Sarulia	M.P.MOZIBUR RAHMAN	1700000000	SHERIKH MOZIBUR RAHMAN	7	17	16	13	1	50000	6500	16000	192000	2	30	8			1	1	2	5		5		1	3	1
	510	36193	22.7941	89.158	CHOTO KASHIPUR (DAKHIN PARA)	FATEMA BEGUM	NIZAM SHEIKHER BARIR STW	CHOTO KASHIPUR NIZAM SHEIKHER BARI	Sarulia	MD. NIZAM SHEIKH	1700000000	MD. NIZAM SHEIKH	3	13	14	12	2	15000	1300	8000	96000	3	10	8			2	1	2	5		5		1	2	2
	512	36474	22.7434	89.1612	CHOMORKHALI (PAR PARA)	RAJIA BEGUM	PAR PARA AKRAMER STW	PAR PARA AKRAMER OWN BARI	Sarulia	AKRAM PAR	1700000000	AKRAM PAR	4	32	1		1	12000	5000	9000	110000	3	16	8			1	1	2	5		5		1	2	1
	515	36590	22.7897	89.1547	CHOTO KASHIPUR (RISHI PARA)	MUGLU DAS	SHANTIMOT GOBINDA MONDIRER DTW	GOBINDA MONDIRER SAMNE BARI	Sarulia	DOLIT NGO DTW	2000000000	CHANDRA SHEIKHOR DAS	5	13	14		1	8000	1100	15000	180000	2	20	8			1	1	2	5		5		1	2	2
	516	36685	22.7747	89.1564	CHOWGACHA(SHEIKH PARA)	HASINA BEGUM	SHEIKH PARA MASJIDER PASHE DTW	MASJIDER PASHE BARI	Sarulia	GOVT. DTW	1700000000	SHEIKH ABDUL MAJID	3	28	16		1	5000	800	9000	110000	3	10	8			1	1	2	5		5		1	3	1
	519	37018	22.7466	89.16	HOGLADANGA (MAJHER PARA)	SUCHITRA MONDAL	MUKUNDA SARKARER STW	HOGLA DANGA MANDIRER PASE MUKUNDER BARI	Sarulia	MUKUNDA SARKAR	1700000000	MUKUNDA SARKAR	4				1	15000	90	24000	288000	2	12	8			1	1	2	5		5		1	3	1
	521	37294	22.7575	89.1525	JUGI PUKURIA (MOROL PARA)	MST. HAFIZA BEGUM	NAZRUL MOROLER STW	MOROL PARA NAZRUL ER BARI	Sarulia	MD. NAZRUL MOROL	1800000000	MD. NAZRUL ISLAM MOROL	4	13	14	15	2	3000	700	8000	96000	4	13	8			1	1	2	5		5		2
	523	37551	22.7512	89.1674	JUJKHOLA	SURAIYA BEGUM	JUJKHOLA GOVT. PRI. SCHOOL DTW	PRIMARY SCHOOLER SAMNE OHIDUL MOROLER BARI	Sarulia	GOVT. DTW	1700000000	MD. OHIDUL ISLAM MOROL	6	16	12	23	1	20000	3000	17000	204000	2	25	8			1	1	2	5		5		1	3	1
	524	37552	22.7541	89.1693	JUJKHOLA(MADYA PARA/SARDAR PARA)	MD. HATEM ALI SARDAR	HATEM SARDARER DTW	BERISTER BARI	Sarulia	MD. HATEM ALI SARDAR	1700000000	MD. HATEM ALI SARDAR	6				1	15000	900	30000	360000	1	30	8			1	1	2	5		5		1	3	1
	527	37735	22.7537	89.1711	JUJKHOLA (MADYA PARA)	MST. RASHIDA BEGUM	ABDUL SATTAR SHEIKHER STW	ABDUL SATTAR SHEIKH ER BARI	Sarulia	ABDUL SATTAR SHEIKH	1800000000	ABDUL SATTAR SHEIKH	8	28	15	16	2	200000	2500	8000	100000	3	36	8			2	1	2	5		5		1	3	1
	530	38372	22.7729	89.1605	PAR KUMIRA	NASIR UDDIN	PASCHIM PARA MASJID	MASJIDER SAMNE	Sarulia	MASJID COMMITTE	1800000000	AFSAR ALI	6	6	13		2	9600	800	9000	108000	2	18	2			3	6				1		1	1	1
	531	38381	22.7654	89.1686	PATKELGHATA(BRIDGER NICHE)	JANUR (JAHANARA)	PATKELGHATA BRIDGER NICHE STW	PATKELGHATA BRIDGER NICHE JANUR STW	Sarulia	JANUR STW	1900000000	MD. FARUK MIAH	3	13			2	12000	900	13000	156000	3	10	2	6		2	5				1		1	3	2
	533	38429	22.7648	89.166	PATKELGHATA	SHEIKH ABDUL MANNAN	PATKELGHATA HIGH SCHOOL	PATKELGHATA SCHOOLER PASHE	Sarulia	GOVT. TUBEWELL	1700000000	SHEIKH ABDUL MANNAN	3	13			1	72000	6000	8000	96000	2	12	3	2		3	6				1		1	1	4
	534	38696	22.7657	89.1685	PATKELGHATA(BARO BRODGER NICE)	ASMA BEGUM	PATKELGHATA BAZARER PASE STW	BARO BRIDGEER NICHE BARI	Sarulia	BAZARER PASHE GOVT. STW	1800000000	ABDUL MAJID SANA	3	12	13		2	6000	800	12000	144000	2	10	8			2	1	2	5		5		1	3	1
	537	38755	22.7838	89.1597	POTIAKHALI (GHOSH PARA)	DEBOKHI GHOSH	GHOSH PARA MANDIRER PASHE DTW	GHOSH PARA MANDIRER SATHE BARI	Sarulia	MANDIRER PASHE GOVT. DTW	1700000000	SUJIT GHOSH	8	22	16	13	1	6000	700	20000	240000	2	28	8			2	1	2	5		5		1	3	1
	538	38758	22.7868	89.1601	PUTIAKHALI (GHOSH PARA UTTAR)	SADHON GHOSH	UTTAR PARA MANDIRER PASHE DTW	UTTAR PARA SADHON GHOSHER BARI	Sarulia	GOVT. DTW	1700000000	SADHON GHOSH	4	12	22		1	30000	1000	15000	180000	2	20	8			1	1	2	5		5		1	4	1
	539	38759	22.7803	89.1578	BAROBILA (DAKHIN PARA)	NUR NAHAR	BARO BILA EIDGAON MATHER DTW	BARO BILA EIDGAON MATHER SATHE RAFNER BARI	Sarulia	GOVT. DTW	1700000000	MD. ROFIQUL ISLAM SHEIKH	4	13			1	23000	1400	20000	240000	2	15	8			1	1	2	5		5		1	3	1
	543	39167	22.7554	89.1645	RAJENDRAPUR (GHOSH PARA)	MONIMALA GHOSH	(MONTU GHOSH) MONTAR BARI STW	MONTU GHOSH (MONTAR BARI)	Sarulia	MONTU GHOSH	1700000000	MONTU GHOSH (MONTA)	4	12	13		1	12000	1000	15000	180000	2	12	8			1	1	2	5		5		1	3	1
	546	39578	22.7935	89.1433	SORULIA	MONOWARA BEGUM (MEMBER)	MONOWARA MEMBERER STW	SORULIA MEMBERER BARI	Sarulia	MST. MONOWARA MEMBER	1700000000	MD. HABIBULLAH BAHAR	5	13	14	15	1	20000	1500	20000	240000	2	20	2	5		2	1	2			7	8	1	3	1
	547	39675	22.7962	89.1442	SORULIA (MADRASAR SAMNE)	ASMA PARVIN	SORULIA MADRASAR STW	MADRASAR SAMNE BARI	Sarulia	SARULIA MADRASAR STW	1700000000	KAZI NAZRUL ISLAM	7	13	14		1	23000	1200	17000	204000	2	25	8			2	1	2	5		5		1	3	1
	550	39823	22.7642	89.1452	SHAKDAH (SARDAR PARA)	MD. JAFOR ALI MOROL	SHAKDAH PURAN MASJIDER DTW	MASJIDER PASHE JAFOR MOROL BARI	Sarulia	GOVT. DTW	1800000000	MD. JAFOR ALI MOROL	3	13	14		1	16000	1200	15000	180000	2	10	8			1	1	2	5		5		1	3	1
	551	39824	22.7577	89.1466	JUGIPUKURIA (PASCHIM PARA)	BILLAL SARDAR	JUGIPUKURIA MADRASAR DTW	MADRASAR PASHE MOJAM SARDAR ER BARI	Sarulia	GOVT. DTW	1700000000	MD. MOJAM SARDAR	6	16	14		2	23000	1500	12000	144000	2	20	8			2	1	2	5		5		1	2	1
	553	40034	22.7644	89.1422	SHAKDAH (DAS PARA)	AROBINDU DAS	CHITTA GOSAI ER STW	CHITTA GOSAI BARIR PASHE AROBINDURER BARI	Sarulia	CHITTA RANJON DAS GOSAI	1800000000	AROBINDU DAS	4				1	23000	300	12000	144000	2	10	8			1	1	2	5		5		1	3	1
	554	40057	22.7629	89.1425	SHAKDAH (PASCHIM PARA)	KOHINUR BEGUM	SHAKDAH PASC.PARA MASJIDER STW	MASJIDER SATHE AZGAR ALIR BARI	Sarulia	GOVT. STW	1800000000	AZGAR ALI SARDAR	4	13	14	15	2	5000	2000	8000	100000	3	10	8			1	1	2	5		5		2
	555	40127	22.7609	89.1433	SHAKDAH (DAKHIN PARA)	SALMA PARVIN	SHOFIQULER OWN STW	DAKHIN PARA MASJIDER PASHE SHOFIQULER BARI	Sarulia	MD. SHOFIQUL ISLAM	1700000000	MD. SHOFIQUL ISLAM	6	12	16		1	20000	3000	15000	180000	2	20	8			1	1	2	5		5		1	3	1
	556	40214	22.7643	89.1447	SHAKDAH (SARDAR PARA)	JEASMIN BEGUM	ARSHAD SARDAR STW	SHAKDAH SARDAR PARA ARSHADER BARI	Sarulia	MD. ARSHAD SARDAR	1700000000	MD. ARSHAD SARDAR	4	13	14		1	15000	1000	10000	120000	3	12	8			1	1	2	5		5		1	3	1
	559	40288	22.7573	89.1588	TOILKUPI (MATH PARA)	MADAN DAS	MATHPARA MANDIRER PATHE DTW	MATH PARA MANDIRER PASHE MADAN DASER BARI	Sarulia	GOVT. DTW	1700000000	MADAN DAS	5	13	14		2	12000	800	8000	100000	3	16	8			1	1	2	5		5		1	3	1
	563	41417	22.8016	89.2622	ALADIPUR	MORJINA BEWA	ALADIPUR DAKHIN PARA JAME MASZID	MOSHIAR GAZIR BARI	Tala Sadar	ALADIPUR DAKHIN PARA MASJID	1900000000	MORJINA BEWA	3	31			1	10000	1500	7000	90000	4	12	8			1	1	2	5		5		2
	566	41814	22.7842	89.2735	ATHAROI	JALAL JOARDDAR	JOADDAR PARA	JOADDAR BARI	Tala Sadar	JALAL JOADDAR	1900000000	JALAL JOADDAR	7				1	4000	300	20000	30000	1	30	7			2	5				1		1	4	1
	567	41910	22.7767	89.2715	ATHAROI	RESHMA KHATUN	MADYA ATHAROI SCHOOL PURBO PASE	MADYA ASHAROI SCHOOLER PURBO PASHE	Tala Sadar	SOHRAF SHEIKH	1800000000	MD. SIRAJUL ISLAM SHEIKH	5	29			1	1200	80	400	50000	3	16	8			1	2				1		1	1	1
	569	42072	22.7585	89.2598	BAROIHATI	MST. SHILPI	BAROIHATI PASCHIM PARA	BAROIHATI PASCHIM PARA	Tala Sadar	MOFIJUL ISLAM	1700000000	MOFIJUL ISLAM	6				1	1800	100	7000	90000	2	20	7			2	2	5			5		1	2	1
	570	42235	22.7881	89.2674	ATRAI	MONGAL DAS	ATRAI DAS PARA	ATRAI DAS PARA	Tala Sadar	AMOL DAS	1900000000	AMOL DAS	5				1	7000	0	7000	80000	3	25	8			2	2				11		1	1	3
	576	43727	22.7888	89.2719	JEYALA	SAIRUDDIN MORAL	SHEKAR BAZAR MOSQUE PASE	SHEKAR BAZAR MOSQUE	Tala Sadar	SAIRUDDIN	2000000000	SAIRUDDIN MORAL	3	9			1	1200	300	5000	55000	2	10	8			2	5				5		1	1	2
	581	44192	22.7661	89.2399	KHANPUR	LOTIFA BEGUM	HOSSAN MORALER BARI RIYAZULER STW	HOSSANER BARI RIYAZULER BARI	Tala Sadar	RIYAZUL MORAL	1700000000	RIYAZUL MORAL	7	1	13	14	1	150000	1000	9000	100000	3	25	2	5		4	6				1		1	1	1	2015-08-16	12.25	29.3	2015-08-16	12.25	692	2015-08-16	12.23	5	2015-08-16	12.2	50-100	CLOSE TO 100
	591	46507	22.7456	89.257	TALA SADAR	LIZA AKTER	GHOS SHONAT KUMARER BARIR SHAMNE	SHONAT GHOSHER BARI	Tala Sadar	GOVT. TUBEWELL	1700000000	JAKIR HOSSAIN	2				1	2000	300	15000	180000	2	10	8			1	1	2			5		1	4	1
	594	46533	22.7501	89.2568	TALA SADAR	MD. EZAZUL ISLAM	MIRHARUN AR ROSHIDER DTW	TALA GOVT. PUKURER PASHA BARI	Tala Sadar	MIR HARUN AR ROSHID	1700000000	SHEKH SHOHIDUL ISLAM	7	13			1	6000	600	15000	180000	2	30	8			1	1	2			5		1	3	1
	595	46535	22.8082	89.2104	ARONG PARA	MD. SHOFIQUL ISLAM	KARIPARA JAKIR GAZIR DTW	KARIKAR PARA BAYESMILER PASHE ARONG	Tentulia	JAKIR GAZI DTW	1700000000	MD. SHOFIQUL ISLAM	6	28			1	5000	300	10000	125000	2	18	8			2	1	5			5		2
	604	47028	22.7912	89.2145	DHOLBARIA	ALEYA BEGUM	DORPARA MOSQUE	DHOLBARIA MOSQUER PASHER BARI	Tentulia	MOSQUE	1700000000	GIYAS UDDIN SARDAR	4				1	5000	300	4000	5000	3	16	2	3		3	5				1		2
	605	47114	22.7891	89.2175	DHOLBARIA	HABIBUR SHEKH	PAKA ROADER PASHE MOSQUER STW	PAKA ROADER PASHE SHOP	Tentulia	MOSQUER STW	1800000000	HABIBUR RAHMAN	4				1	5000	200	6000	80000	2	14	2	3		3	5				1	9	2
	608	47145	22.8078	89.2287	HATBASH	SALMA BEGUM	MASUMUDDINER BARIR PASHE	MASUMUDDINER BARIR PASHE	Tentulia	SHAMSUDDIN MORAL	1800000000	MD. MOFIDUL MORAL	3				1	1500	50	4000	50000	2	12	8			1	1				5		2
	609	47146	22.8049	89.2344	HATBASH	AYESHA BEGUM	SARDAR PARA A. ROHIMER DTW	SARDAR PARA DTW PASHER BARI	Tentulia	A. ROHIM SARDAR	1700000000	A. ROHIM SARDAR	4	15			1	7500	600	7000	84000	3	18	8			1	1	2	5		5		2
	615	47249	22.7934	89.2139	DHOLBARIA	JAHANARA BEGUM	SHEKH PARA AMZAD SHEKHER BARI	SHEKH PARA AMZAD SHEKHER BARI	Tentulia	AMZAD SHEKH	1700000000	AMZAD SHEKH	5	5			1	6000	300	6000	85000	2	17	2	3		3	5				1	9	2
	616	47620	22.7861	89.2338	KALIYA	MD. A. SAMAD MORAL	KALIYA MORAL PARA DTW	MORAL PARA NURUL MORALER BARI	Tentulia	MORAL PARA DTW	1900000000	MD. A. SAMAD MORAL	6	13			1	1500	175000	5000	62000	3	22	8			1	1	2			5		2
	620	48010	22.8035	89.2362	LOKHONPUR	PURNIMA DAS	MODAN PUR S.P. SCHOOL	MODAN PUR S.P. SCHOOLER PASHER BARI	Tentulia	S.P. SCHOOL	1700000000	GOBINDO DAS	4	13			1	4000	300	3000	3800	4	15	2			3	1	2	5		1	7	2
	622	48452	22.7928	89.2218	NOWAPARA	SHIKHA BEGUM	NOWAPARA BAZAR STW	NOWAPARA BAZARER PASHA BARI	Tentulia	NOWAPARA BAZAR GOVT. STW	1700000000	ROBIUL SARDAR	7	13	16		1	7000	500	10000	125000	2	25	2			3	5				1		1	1	1
	623	48453	22.7922	89.2221	NOWAPARA	KASHEM SHEKH	NOWAPARA BAZAR COMITEE	NOWAPARA BAZARER PASHE	Tentulia	NOWAPARA BAZAR COMITEE	1700000000	KASHEM SHEKH	5	13	16		1	3500	250	9000	110000	2	18	2			3	5				1		2
	624	48454	22.7923	89.2218	NOWAPARA	MORAL SHOHAG	NOYAPARA BAZAR	NOWAPARA BAZARER SHATE	Tentulia	SATTAR MORAL	1800000000	SATTAR MORAL	4				1	4000	450	10000	128000	2	17	2			3	5				1		1	1	1
	627	48488	22.7915	89.2252	NOWAPARA	RIZIYA BEGUM	MORAL PARA MOSQUE NOWAPARA	MORALPARA MOSQUER PASHER BARI	Tentulia	MOSQUE	1800000000	MD. A. JOBBAR MORAL	5				1	5000	200	5000	70000	3	18	2			3	5				1		2
	628	48540	22.7908	89.2218	NOWAPARA	MAZEDA BEGUM	70 NO S.P. SCHOOL	SCHOOLER S. PASHA BARI	Tentulia	70 NO S.P. SCHOOL. DTW	1700000000	MAZEDA BEGUM	2				1	4000	200	3000	38000	3	7	8			2	1	2			1		2
	629	48575	22.8078	89.2377	PASRUKHI	AKKAS ALI SHEKH	PASRUKHI AKKAS ALI SHEKHER BARI	PASRUKHI AKKAS ALI SHEKHER BARI	Tentulia	SARKARI STW	1800000000	AKKAS ALI SHEKH	5				1	4000	200	4000	5000	3	18	2	1		3	5				3		1	1	3
	631	48732	22.8078	89.2489	PASRUKHI	MORIUM BISWAS	PASRUKI MAHABUR BISWASER BARI	PASRUKI MADRASAR PASHER BARI	Tentulia	MAHABUR RAHMAN BISWAS	1700000000	MAHABUB RAHMAN BISWAS	4	13			1	5000	7000	12000	135000	2	17	7			2	2	5			5		2
	632	48981	22.8283	89.251	SHIRASHUNI	BEAUTY BEGUM	PURBOPARA S.P.SCHOOLER STW	PURBOPARA S.P.SCHOOLER PURBO PASSHE	Tentulia	S.P. SCHOOL	1800000000	SAIDUL SARDAR	6	13			1	10000	1000	10000	125000	2	22	2	3		4	5				1	9	2
	633	49007	22.8293	89.2469	SHIRASHUNI	KOMLA BEGUM	SHEKHPARA MOSQUER PASHE STW	SHEKHPARA MOSQUER PASHE BARI	Tentulia	MOSQUE	1800000000	DESHARAT SHEKH	3				1	5000	200	4000	50000	3	12	1	2	3	3	5				1	7	2
	634	49018	22.8276	89.2444	SHIRASHUNI	FERDOUSI BEGUM	SHIRASHUNI SHEKH PARA MOSHARAFKHAN STW	MOSHARAF KHANER MASUM BISWASER BARI	Tentulia	MOSHARAF KHAN	1700000000	MASUM BILLAL	3	29			1	4000	200	7000	90000	2	8	2	3		2	1	2	5		5		2
	636	49092	22.8237	89.2467	SHIRASHUNI	SAKENDAR ALI	SHIRASHUNI BAZARER PASHE	MORAL PARA SEKANDAR ALIR BARI	Tentulia	SAKENDAR ALI	1700000000	SAKENDAR ALI	3	29			1	5000	200	8000	100000	2	10	2	3		2	1	2			1		2
	637	49178	22.8246	89.2502	SHIRASHUNI	SHOPNA BEGUM	SHIRAMONI MORAL PARA MOSQUE	MORAL PARA MOSQUER PASHER BARI	Tentulia	MORAL PARA MOSQUE	1900000000	SHOBUR MORAL	4	13			1	5000	1000	4000	5000	3	16	2	3		3	5				1	9	2
	638	49215	22.8303	89.2528	SHIRASHUNI	ASHRAF MORAL	MORAL PARA MOSQUE	MORAL PARA MOSQUER PASHER BARI	Tentulia	MOSQUE	1900000000	ASHRAF MORAL	9	13			1	7500	700	8000	100000	3	24	8			2	1	2			5		2
	640	49526	22.8133	89.2445	SHUVASNI	MASUM BILLA (BASCHU)	SHUVASNI BAZARER PASHE	SHUVASNI MADRASHAR PASHER BARI	Tentulia	SUVASNI MADRASHA	1700000000	MASUM BILLA (BASCHU)	4				1	8000	400	4000	5000	3	16	8			2	2				1		2
	643	49660	22.8166	89.2342	SHUVASNI	MST. MARUFA BEGUM	KAZI PARA MOSQUE STW	KAZIPARA MOSQUER PASHER BARI	Tentulia	MOSQUER STW	1800000000	SHOHIDUL KAZI	4				1	4000	300	5000	7000	3	13	2	3		3	5				1		2
	644	49677	22.8176	89.2326	SHUVASNI	JOBEDA KHATUN	SARDAR PARA MOSQUER STW	SARDAR PARA MOSQUER PASHER BARI	Tentulia	MOSQUER	2000000000	MOHAMMAD ALI SARDAR	3	13			1	3000	200	3500	40000	3	13	2			3	5				1		2
	645	49702	22.8171	89.2352	SHUVASNI	KAMRUL ISLAM	SARDAR PARA ROADER SHATE MOSZID	MOSQUER PASHER BARI	Tentulia	MOSQUE	1900000000	KAMRUL ISLAM	6				1	7000	400	6000	80000	3	22	2			3	5				1		2
	646	50020	22.7946	89.2438	SHOMUJDIPUR	SUKZAN BEGUM	SHOMUJDIPUR A. HAIER DTW	SHOMUJDIPUR A. HAIER BARIR PASHA	Tentulia	A. HAI	2000000000	SOBHAN MORAL	3	14			1	3000	200	3500	40000	3	10	8			2	1	2			5		2
	647	50036	22.8098	89.2461	PASHROKHI	JOBEDA BEGUM	JALAL UDDIN MORALER BARI STW	PAXHROKHI SHASH MATHAI JALALER BARI	Tentulia	JOBEDA BEGUM	1800000000	JOBEDA BEGUM	1	29			1	1500	100	1800	2000	4	3	7			2	5				5		2
	649	50534	22.8078	89.2145	TARONGI	NASIMA BEGUM	TARONGI PRIMARI SCHOOLER DTW	TARONGI BAZARER PASHER BARI	Tentulia	S. P. SCHOOLER DTW	1700000000	ABUL MORAL	5				1	10000	4000	6000	75000	3	20	8			1	1	2	5		5		2
	651	50603	22.8015	89.2094	TARONGI	MAMONI SHABU	TAJPUR TARONGI SUMOSTO KUMAR SHADHU STW	TARONGI TAZPARA SUMOSTO SABURER BARI	Tentulia	SUMASTO KUMAR SHADHU	1800000000	SUDEB SHADU	3	13			1	3000	200	3500	4000	3	8	8			2	1	2			1		2
	652	50604	22.8001	89.2106	KULAPOTA	KUMAR	GOSHPARA SUKUMAR GHOSHER STW	KOLAPOTA GHOSH PARA SUKUMAR GHOSHER BARI	Tentulia	SREE SUKUMAR GHOSH	1700000000	SUKUMAR GHOSH	5				1	4500	400	6000	75000	3	18	2			2	5				1		2
	670	99999	22.8003	89.2485	PASHRUKHI	AMBIYA BEGUM	KORIM MONGALER BARIR PASHE	KORIM MONGALIR BARIR PASHE	Tentulia	KORIM MONGALI	1900000000	AZARUL MONGALI	3	29	13		1	7000	1000	3500	40000	3	8	8			2	1	2			1		1	1	1
[truncated: 9 more columns]
